# Supplementary material for: Diagnostics of tissue involved injury occurrence of top-level judokas during the competition: suggestion for prevention
Source: PeerJ. 2022 Apr 4;10:e13074. doi: 10.7717/peerj.13074 (PMC8988935; doi:10.7717/peerj.13074)
Supplement: Supplemental Information 1 [file peerj-10-13074-s001.xlsx]

## Sheet: Event
Event:	Total Summary05,06,07,08,09,10,11,12,13,14,15,16,19,20			From :			Notes:
EJU Medic: Dr. Hidas Peter	Dr Peter Smolders			To :			TNF = Total Number of Fights
Judokas:	26862	Male:	15571	Female:	11291	Nations:		Video Tagging:		TNF:
%	100	%	57.9666	%	42.0334
Total number of injured Judoka treated & in % of Total Number of Fights:				691	0.0257241	Out Tat.:	234	0.33864	Hosp :	134	0.00498846
Number of minor injuries (small bleedings, ...):
Sex	Weight	Anat	Type	Tissue	Side	Visit n°	Cont F	Tatami	Hosp	Fight timing	tori/uke	Technique	Video ID	Diagnosis
2 Male	+90 M Cadet	09 Neck	05 Luxatio	07 Nerve / Brain	05 Midline	01 First	02 No	01 On Tatami	01 Yes	01 First Half	02 Uke
1 Female	-40 F Cadet	13 Elbow joint	05 Luxatio	13 Joint	03 Left	01 First	02 No	01 On Tatami	01 Yes	01 First Half	02 Uke
1 Female	-63 F	03 Skull	04 Distension	03 Skin / Subcutis	03 Left	01 First	01 Yes	01 On Tatami	02 No	03 Last Minute
1 Female	-52 F	13 Elbow joint	04 Distension	06 Ligament	04 Right	01 First	02 No	01 On Tatami	02 No	03 Last Minute
1 Female	-52 F	13 Elbow joint	04 Distension	06 Ligament	04 Right	01 First	01 Yes	02 Out of Tatami	01 Yes	02 Last Half	02 Uke
2 Male	-55 M Junior	03 Skull	11 Bandage	03 Skin / Subcutis	04 Right	01 First	02 No	02 Out of Tatami	02 No	03 Last Minute
2 Male	-55 M Junior	13 Elbow joint	06 Contusio	03 Skin / Subcutis	03 Left		02 No	01 On Tatami	01 Yes	03 Last Minute
2 Male	+90 M Cadet	09 Neck	03 Fracture	04 Bone	05 Midline	01 First	02 No		01 Yes		02 Uke	Koshi Guruma	M4, +90, Quarter Final, POR/GER	Fracture C5
2 Male	-66 M	24 Knee	04 Distension	06 Ligament	03 Left		02 No			02 Last Half	02 Uke		M4, -66, Rep, AZE/UKR
1 Female	+78 F	23 Femur	04 Distension	08 Muscle	03 Left	01 First	02 No		01 Yes		01 Tori	Tai-O-Otoshi	M1, +78, R2, Blue TUR	Trauma Luisse Dechirure Muscles loge posterieure = Ischio jointier grade 1
2 Male	+100 M	07 Nose	06 Contusio	03 Skin / Subcutis	05 Midline	01 First	01 Yes		02 No	01 First Half			M4, +100, Rep, UKR/SLO
2 Male	-66 M	24 Knee	09 Rupture	06 Ligament	04 Right		01 Yes				02 Uke		Training 24/04, Larose, -66kgs	Deriear Cruciate Ligament
2 Male	-90 M	24 Knee	04 Distension	06 Ligament	03 Left	01 First	02 No		01 Yes	03 Last Minute			M4, -90, Quarter Final, POR / GER
1 Female	-70 F	24 Knee	04 Distension	06 Ligament	03 Left	01 First	02 No		02 No		02 Uke	Seoi- Nage	M2, -70, R1, Blue, ESP/POL
2 Male	-55 M Junior	27 Foot	04 Distension	06 Ligament	03 Left	01 First			02 No
1 Female	-48 F	27 Foot	09 Rupture	03 Skin / Subcutis	03 Left	01 First	01 Yes		02 No
2 Male	-81 M	26 Ankle	06 Contusio		04 Right	01 First	01 Yes		02 No
2 Male	+90 M Cadet	12 Shoulder / Arm	06 Contusio	08 Muscle	03 Left	01 First			02 No
1 Female	-78 F	12 Shoulder / Arm	04 Distension	06 Ligament	04 Right	01 First	01 Yes		02 No
1 Female	+78 F	12 Shoulder / Arm	04 Distension	06 Ligament	03 Left	01 First	02 No		01 Yes
1 Female	-70 F	24 Knee	04 Distension	06 Ligament	04 Right	01 First	02 No		02 No
2 Male	+100 M	23 Femur	06 Contusio	08 Muscle	03 Left	01 First	02 No		02 No
1 Female	+70 F Cadet	09 Neck	04 Distension	08 Muscle	03 Left	01 First	02 No		02 No
2 Male	-55 M Junior	10 Throath	12 Strangulation			01 First	02 No		02 No
2 Male	-55 M Junior	09 Neck	12 Strangulation			01 First	02 No		02 No
2 Male	-66 M	09 Neck	12 Strangulation			01 First	02 No		02 No
1 Female	-70 F	09 Neck	12 Strangulation			01 First	02 No		02 No
2 Male	-66 M	16 Hand / Finger	06 Contusio				01 Yes		02 No
2 Male	-81 M	04 Face	06 Contusio				01 Yes		02 No
1 Female	-78 F	05 Eye	06 Contusio	03 Skin / Subcutis	03 Left	02 Second	01 Yes		02 No
2 Male	-60 M	04 Face	09 Rupture	03 Skin	03 Left	01 First	01 Yes	01 On Tatami	02 No					02 No	Skin suture necessary
2 Male	-90 M	07 Nose	03 Fracture	04 Bone	05 Midline	03 Third	02 No		02 No		01 Tori			02 No	Nose Fracture
2 Male	-81 M	04 Face	09 Rupture	03 Skin	05 Midline	03 Third	02 No	01 On Tatami	02 No		01 Tori			02 No	diffuse bleeding acne vulgaris
1 Female	-52 F	09 Neck	12 Strangulation		05 Midline	01 First	02 No	01 On Tatami	02 No	(01 First Half)	02 Uke			01 Yes	strangulation
1 Female	-52 F	06 Ear	(08 Bleeding / Excoriatio)	03 Skin	03 Left	01 First	01 Yes	01 On Tatami	02 No	(01 First Half)	02 Uke			01 Yes	Ear ecscoriation
2 Male	-66 M	09 Neck	12 Strangulation		05 Midline	01 First	02 No	01 On Tatami	02 No	(01 First Half)	02 Uke			01 Yes	strangulation
1 Female	-52 F	09 Neck	12 Strangulation		05 Midline	01 First	02 No	01 On Tatami	02 No	(01 First Half)	02 Uke			01 Yes	strangulation
1 Female	-63 F	17 Thorax	04 Distension	08 Muscle	04 Right	01 First	01 Yes	01 On Tatami	02 No	(02 Last Half)	01 Tori			01 Yes	Contusio and distension of pectoral muscle
1 Female	-63 F	11 Clavicle / AC	06 Contusio	06 Ligament	04 Right	01 First	02 No	01 On Tatami	02 No	(01 First Half)	01 Tori			01 Yes	Contusio of Clavicule/AC joint
1 Female	-57 F	16 Hand / Finger	06 Contusio	(10 Nail)	03 Left	01 First	01 Yes	01 On Tatami	02 No	(01 First Half)	01 Tori			01 Yes	Contusio and haemotoma of undernail tissues
2 Male	-100 M	23 Femur	09 Rupture	08 Muscle	03 Left	01 First	02 No	01 On Tatami	02 No	(01 First Half)	02 Uke			02 No	Rupture of ischiofemoral muscle
2 Male	-100 M	11 Clavicle / AC	06 Contusio	06 Ligament	03 Left	01 First	02 No	01 On Tatami	02 No	(01 First Half)	02 Uke			01 Yes	Contusio of Clavicule/AC joint
2 Male	-90 M	24 Knee	09 Rupture	06 Ligament	03 Left	01 First	02 No	01 On Tatami	01 Yes	(01 First Half)	02 Uke			02 No	Rupture of ACL and external collateral Ligaments and meniscus
2 Male	-100 M	12 Shoulder / Arm	05 Luxatio	06 Ligament	04 Right	01 First	01 Yes	01 On Tatami	02 No	02 Last Half	01 Tori
1 Female	-57 F	26 Ankle	04 Distension	06 Ligament	04 Right	01 First	02 No	01 On Tatami	01 Yes	03 Last Minute	01 Tori
1 Female	+78 F	24 Knee	04 Distension	06 Ligament	04 Right	01 First	02 No	01 On Tatami	02 No	03 Last Minute	01 Tori
2 Male	+100 M	15 Wrist	04 Distension	06 Ligament	04 Right	01 First	02 No	01 On Tatami	01 Yes	02 Last Half	01 Tori
1 Female	-78 F	13 Elbow joint	04 Distension	08 Muscle	04 Right	01 First	01 Yes	01 On Tatami	02 No	02 Last Half	02 Uke
1 Female	-70 F	13 Elbow joint	04 Distension	06 Ligament	03 Left	01 First	02 No	01 On Tatami	01 Yes		02 Uke				athlete taken to emergency
1 Female	-70 F	07 Nose	06 Contusio	05 Cartilage	05 Midline	01 First	01 Yes	01 On Tatami	02 No	(03 Last Minute)					trauma contusio con lieve sanguinamento nasale
1 Female	-63 F	12 Shoulder / Arm	05 Luxatio	06 Ligament	03 Left	01 First	02 No	02 Out of Tatami	02 No		02 Uke				sospetta lussasine spalle S
1 Female	-57 F	16 Hand / Finger	08 Bleeding / Excoriatio	03 Skin / Subcutis	04 Right	01 First	01 Yes	01 On Tatami	02 No	03 Last Minute
2 Male	-81 M	12 Shoulder / Arm	05 Luxatio	06 Ligament	03 Left	01 First	02 No	01 On Tatami	02 No	01 First Half	02 Uke
2 Male	-81 M	24 Knee	04 Distension	05 Cartilage	03 Left	01 First	02 No	01 On Tatami	02 No	01 First Half	02 Uke
2 Male	-73 M	24 Knee	04 Distension	06 Ligament	04 Right	01 First	02 No	01 On Tatami	01 Yes	01 First Half	02 Uke
2 Male	-73 M	09 Neck	04 Distension	08 Muscle	05 Midline	01 First	01 Yes	01 On Tatami	02 No	01 First Half	02 Uke
2 Male	+100 M	24 Knee	04 Distension	06 Ligament	03 Left	01 First	01 Yes	01 On Tatami	02 No	03 Last Minute	02 Uke
2 Male	-81 M	27 Foot	08 Bleeding / Excoriatio	10 Nail	04 Right	01 First	01 Yes	01 On Tatami	02 No	01 First Half
2 Male	-73 M	09 Neck	04 Distension	08 Muscle		01 First	02 No	01 On Tatami	02 No	03 Last Minute
1 Female	-52 F	10 Throath	13 Other			01 First	02 No	01 On Tatami	02 No	02 Last Half
2 Male	-73 M	11 Clavicle / AC	03 Fracture	04 Bone	03 Left	01 First	02 No	01 On Tatami	01 Yes	01 First Half
1 Female	-52 F	14 Forearm	06 Contusio	08 Muscle	03 Left	01 First	01 Yes	01 On Tatami	02 No	03 Last Minute
2 Male	-81 M	03 Skull	07 Commotio	07 Nerve / Brain		01 First	02 No	01 On Tatami	02 No	02 Last Half
2 Male	-90 M	03 Skull	07 Commotio	07 Nerve / Brain	03 Left	01 First	02 No	01 On Tatami	01 Yes	02 Last Half	02 Uke
1 Female	-52 F	03 Skull	07 Commotio	07 Nerve / Brain	05 Midline	01 First	02 No	01 On Tatami	02 No	02 Last Half
1 Female	-52 F	27 Foot	03 Fracture	04 Bone	03 Left	01 First	02 No	02 Out of Tatami	01 Yes
2 Male	-66 M	12 Shoulder / Arm	06 Contusio	08 Muscle	04 Right	01 First	01 Yes	01 On Tatami	02 No	01 First Half	02 Uke
2 Male	-50 M Cadet	27 Foot	13 Other	04 Bone	04 Right	01 First	02 No	01 On Tatami	01 Yes	02 Last Half	02 Uke
2 Male	-50 M Cadet	13 Elbow joint	04 Distension	06 Ligament	04 Right	01 First	01 Yes	01 On Tatami	02 No	03 Last Minute	01 Tori
2 Male	-66 M	07 Nose	08 Bleeding / Excoriatio	03 Skin / Subcutis	05 Midline	01 First	01 Yes	01 On Tatami	02 No	01 First Half	02 Uke
1 Female	-48 F	24 Knee	04 Distension	06 Ligament	03 Left	01 First	01 Yes	01 On Tatami	02 No	03 Last Minute	01 Tori
2 Male	-50 M Cadet	13 Elbow joint	04 Distension	06 Ligament	04 Right	01 First	01 Yes	01 On Tatami	02 No	03 Last Minute	02 Uke
2 Male	-60 M	13 Elbow joint	04 Distension	06 Ligament	04 Right	01 First	01 Yes	02 Out of Tatami	02 No
1 Female	-44 F Junior	13 Elbow joint	05 Luxatio	06 Ligament	04 Right	01 First	02 No	01 On Tatami	01 Yes	02 Last Half	02 Uke
2 Male	-60 M	11 Clavicle / AC	05 Luxatio	05 Cartilage	04 Right	01 First	02 No	01 On Tatami	01 Yes	03 Last Minute	02 Uke
2 Male	+90 M Cadet	12 Shoulder / Arm	05 Luxatio	06 Ligament	03 Left	01 First	02 No	01 On Tatami	01 Yes	02 Last Half	02 Uke
2 Male	-60 M	07 Nose	08 Bleeding / Excoriatio	03 Skin / Subcutis	04 Right	01 First	01 Yes	01 On Tatami	02 No	01 First Half	01 Tori
1 Female	-52 F	18 Back	04 Distension	08 Muscle	03 Left	01 First	01 Yes	01 On Tatami	02 No	03 Last Minute	02 Uke
1 Female	-63 F	09 Neck	04 Distension	08 Muscle	04 Right	01 First	01 Yes	02 Out of Tatami	02 No
2 Male	-73 M	09 Neck	12 Strangulation	05 Cartilage	05 Midline	01 First	02 No	01 On Tatami	02 No	02 Last Half	02 Uke
2 Male	+90 M Cadet	03 Skull	07 Commotio	07 Nerve / Brain	05 Midline	01 First	02 No	02 Out of Tatami	01 Yes
1 Female	-48 F	24 Knee	04 Distension	06 Ligament	04 Right	01 First	01 Yes	01 On Tatami	02 No	03 Last Minute				Dist gen dx
1 Female	-63 F	17 Thorax	06 Contusio	05 Cartilage	04 Right	01 First	01 Yes	01 On Tatami	02 No	02 Last Half				Cont thoracis dext
1 Female	-48 F	13 Elbow joint	04 Distension	06 Ligament	03 Left	01 First	01 Yes	01 On Tatami	02 No	02 Last Half				Dist cubiti sin
1 Female	-70 F	12 Shoulder / Arm	06 Contusio	06 Ligament	04 Right	01 First	01 Yes	02 Out of Tatami	02 No
2 Male	-60 M	26 Ankle	04 Distension	06 Ligament	03 Left	01 First	02 No	01 On Tatami	02 No	02 Last Half	01 Tori		M3 -60 RUS/TUR	Distortion left ankle
2 Male	-81 M	13 Elbow joint	04 Distension	06 Ligament	04 Right	01 First	02 No	01 On Tatami	02 No	01 First Half	02 Uke		M1 -81 R2 EGY/FRA	ligamental lesion elbow
2 Male	-100 M	26 Ankle	04 Distension	06 Ligament	04 Right	01 First	01 Yes	02 Out of Tatami	02 No	02 Last Half			M2 -100 R1 LTU/GEO	sprain left ankle
1 Female	-70 F	10 Throath	12 Strangulation	07 Nerve / Brain	05 Midline	01 First	02 No	01 On Tatami	02 No	02 Last Half	02 Uke		M1 -70 R1 TUR/UKR	unconscious after shime-waza
1 Female	-70 F	17 Thorax	03 Fracture	04 Bone	04 Right	01 First	02 No	02 Out of Tatami	01 Yes				M3 -70 GER/KAZ	rib fracture
2 Male	-90 M	13 Elbow joint	04 Distension	06 Ligament	04 Right	01 First	02 No	01 On Tatami	01 Yes	02 Last Half	02 Uke		M3 -90 R2 EGY/EST	ligamental lesion right elbow
2 Male	-81 M	13 Elbow joint	04 Distension	06 Ligament	04 Right	01 First	01 Yes	02 Out of Tatami	02 No	01 First Half			-81 R2 EST/EGY	ligamental lesion right elbow
2 Male	-100 M	24 Knee	04 Distension	06 Ligament	03 Left	01 First	02 No	01 On Tatami	01 Yes	03 Last Minute	02 Uke		M2 -100 RUS/KGZ	ligamental lesion left knee
1 Female	-52 F	10 Throath	12 Strangulation	07 Nerve / Brain	05 Midline	01 First	02 No	01 On Tatami	02 No	03 Last Minute	02 Uke	Strangulation		unconscious. Chest press x2
2 Male	-50 M Cadet	13 Elbow joint	04 Distension	06 Ligament	03 Left	01 First	02 No	01 On Tatami	02 No	03 Last Minute	02 Uke	juji-gatame		distensio cubiti sin
2 Male	-60 M	26 Ankle	04 Distension	06 Ligament	04 Right	01 First	01 Yes	01 On Tatami	02 No					distensio tarsi dx
1 Female	-48 F	12 Shoulder / Arm	04 Distension	06 Ligament	03 Left	01 First	01 Yes	01 On Tatami	02 No		02 Uke			Distensio art. Humeroscapul sin
1 Female	-48 F	24 Knee	04 Distension	06 Ligament	03 Left	01 First	01 Yes	02 Out of Tatami	02 No		02 Uke			Distensio/ contusio genu sin
2 Male	-81 M	03 Skull	07 Commotio	07 Nerve / Brain	05 Midline	01 First	02 No	01 On Tatami	02 No	01 First Half	01 Tori	kouchi maki komi		commotio cerebri
2 Male	-81 M	24 Knee	04 Distension	06 Ligament	04 Right	01 First		02 Out of Tatami	02 No					disdtensio LCL dx ( tear susp)
1 Female	-57 F	13 Elbow joint	03 Fracture	04 Bone	03 Left	01 First	02 No	01 On Tatami	01 Yes	01 First Half	02 Uke	sumi gaeshi		Luxatio cubit dx . No FR, checked in hospital, reponated in teh hall( GER-Fra)
2 Male	-81 M	17 Thorax	06 Contusio	08 Muscle	04 Right	01 First	02 No	02 Out of Tatami	02 No		02 Uke			contusio thoracis, muscle spasm
2 Male	-81 M	11 Clavicle / AC	05 Luxatio	13 Joint	04 Right	01 First	02 No	01 On Tatami	01 Yes	02 Last Half				luxatio Ac dx
1 Female	-63 F	24 Knee	09 Rupture	06 Ligament	03 Left	01 First	02 No	01 On Tatami	01 Yes	01 First Half	02 Uke	migi ko soto gake	yes	Unhappy triadi sin,first min.FIN- AUT 63 kg. To hospital later. Team
2 Male	-73 M	04 Face	08 Bleeding / Excoriatio	03 Skin / Subcutis	03 Left	01 First	01 Yes	01 On Tatami	02 No	03 Last Minute	01 Tori			Wound of paraorbital region of left eye
2 Male	-66 M	08 Mouth	08 Bleeding / Excoriatio	03 Skin / Subcutis	05 Midline	01 First	01 Yes	01 On Tatami	02 No	03 Last Minute	02 Uke			Excoriatio of lips
2 Male	-100 M	04 Face	08 Bleeding / Excoriatio	03 Skin / Subcutis	03 Left	01 First	01 Yes	01 On Tatami	02 No	03 Last Minute	01 Tori			Wound of paraorbital region of left eye
2 Male	+100 M	24 Knee	04 Distension	06 Ligament	03 Left	01 First	01 Yes	01 On Tatami	02 No	01 First Half	02 Uke			Distansion of collateral ligament of left knee
2 Male	+100 M	16 Hand / Finger	06 Contusio	06 Ligament	03 Left	01 First	01 Yes	01 On Tatami	02 No	03 Last Minute	02 Uke			Contusio of 1 finger of left wirst
2 Male	-66 M	16 Hand / Finger	08 Bleeding / Excoriatio	03 Skin / Subcutis	04 Right	01 First	01 Yes	01 On Tatami	02 No	02 Last Half	01 Tori			Excoriatio of the 3 finger of right hand
1 Female	-52 F	08 Mouth	06 Contusio	03 Skin / Subcutis	05 Midline	01 First	01 Yes	01 On Tatami	02 No	01 First Half	01 Tori			Contusio of lips
1 Female	-70 F	26 Ankle	04 Distension	06 Ligament	03 Left	01 First	01 Yes	01 On Tatami	02 No	02 Last Half	01 Tori			Distension of collateral ligament of left ankle joint
1 Female	-52 F	26 Ankle	04 Distension	06 Ligament	04 Right	01 First	01 Yes	02 Out of Tatami	02 No					Distension of collateral ligament of right ankle joint
1 Female	+78 F	16 Hand / Finger	06 Contusio	06 Ligament	04 Right	01 First	01 Yes	01 On Tatami	02 No	01 First Half	01 Tori			Contusio of the 3 -2 fingers of right hand
1 Female	-70 F	24 Knee	04 Distension	06 Ligament	04 Right	01 First	01 Yes	01 On Tatami	02 No	02 Last Half	01 Tori			Distension of collateral ligament of right knee joint
2 Male	-73 M	16 Hand / Finger	04 Distension	06 Ligament	04 Right	01 First	01 Yes	01 On Tatami	02 No	03 Last Minute
1 Female	-48 F	24 Knee	09 Rupture	06 Ligament	04 Right	01 First	02 No	01 On Tatami	01 Yes	03 Last Minute
2 Male	-60 M	05 Eye	08 Bleeding / Excoriatio	11 Cornea	04 Right	01 First	01 Yes	02 Out of Tatami	02 No	02 Last Half
2 Male	-73 M	11 Clavicle / AC	06 Contusio	06 Ligament	03 Left	01 First	01 Yes	01 On Tatami	02 No	01 First Half
2 Male	-100 M	12 Shoulder / Arm	05 Luxatio	06 Ligament	04 Right	01 First	01 Yes	01 On Tatami	02 No	03 Last Minute
2 Male	-66 M	10 Throath	12 Strangulation	07 Nerve / Brain		01 First	02 No	01 On Tatami	02 No		02 Uke	shime-waza	?	strangulated , unconscious, somnolent
1 Female	-78 F	12 Shoulder / Arm	05 Luxatio	13 Joint	04 Right	01 First	02 No	01 On Tatami	02 No		01 Tori	Morote seoi nage		Reluxatio humeri dx. Old injury, tempted morote s n. Reponated in medical room
1 Female	-70 F	13 Elbow joint	04 Distension	13 Joint	03 Left									Distensio elbow sin. ( no more informatio given)
2 Male	-81 M	08 Mouth	08 Bleeding / Excoriatio	03 Skin / Subcutis										ruptura ? Labi superior = vulnus/bleeding
2 Male	+100 M	25 Leg	06 Contusio	03 Skin / Subcutis	04 Right	01 First		01 On Tatami						contusio tibiae dx
2 Male	-81 M	24 Knee	04 Distension	06 Ligament	03 Left			02 Out of Tatami	02 No					Distensio Ligamenti CM. S N
2 Male	-81 M	16 Hand / Finger			03 Left		01 Yes	01 On Tatami	02 No	02 Last Half			ITA	Axconiglio - rupture of nail / bleeding
2 Male	-60 M	24 Knee	09 Rupture	05 Cartilage	04 Right			02 Out of Tatami	02 No				MGL	Rupture Mniscu
2 Male	-66 M	13 Elbow joint	04 Distension	06 Ligament	04 Right			02 Out of Tatami					ISR	Distonsio Cubiti
2 Male	-81 M	06 Ear		03 Skin / Subcutis	03 Left	01 First	01 Yes	01 On Tatami	02 No				CZE	Bleeding Ear
2 Male	-90 M	16 Hand / Finger		03 Skin / Subcutis	04 Right	01 First	01 Yes	01 On Tatami	02 No					Bleeding Finger
2 Male	-66 M	24 Knee	06 Contusio	08 Muscle	04 Right	02 Second	01 Yes	01 On Tatami	02 No	03 Last Minute	01 Tori
1 Female	-57 F	24 Knee	04 Distension	04 Bone	03 Left	01 First	02 No	01 On Tatami	01 Yes	03 Last Minute	02 Uke
2 Male	-90 M	26 Ankle	05 Luxatio	06 Ligament	03 Left	01 First	02 No	02 Out of Tatami	01 Yes	03 Last Minute	02 Uke
2 Male	-100 M	26 Ankle	04 Distension	06 Ligament	03 Left	01 First	02 No	02 Out of Tatami	02 No					distention anterior fibulotalar ligament
2 Male	-73 M	24 Knee	04 Distension	06 Ligament	03 Left	01 First	01 Yes	01 On Tatami	02 No					distention medial collateral ligament
1 Female	-70 F	24 Knee	04 Distension	06 Ligament	03 Left	01 First	01 Yes	02 Out of Tatami	02 No					distention medial collateral ligament
2 Male	-81 M	26 Ankle	04 Distension	06 Ligament	03 Left	01 First	01 Yes	02 Out of Tatami	02 No					distention anterior fibulotalar ligament
1 Female	+78 F	13 Elbow joint	04 Distension	06 Ligament	04 Right	01 First	01 Yes	02 Out of Tatami	02 No		02 Uke	juji gatame		distention medial collateral ligament
2 Male	-81 M	13 Elbow joint	04 Distension	06 Ligament	04 Right	01 First	01 Yes	01 On Tatami	02 No		02 Uke	juji gatame	M-81 HUN-SRB	distention medial collateral ligament
1 Female	+78 F	11 Clavicle / AC	06 Contusio	04 Bone	04 Right	01 First	02 No		01 Yes		02 Uke		Ivana Sutalo CRO	Shoulder Injury
1 Female	-52 F	07 Nose	06 Contusio	04 Bone	05 Midline	01 First	01 Yes		02 No				Du Port Lucile FRA	contusione pirimidznasale, su pregresse riferita frattura, lievz epistass prontemente nasale messo giacchio
1 Female	-63 F	18 Back	04 Distension	08 Muscle	03 Left	01 First	02 No	01 On Tatami	01 Yes	03 Last Minute	02 Uke
1 Female	-63 F	09 Neck	04 Distension	08 Muscle	03 Left	01 First	02 No	01 On Tatami	01 Yes	03 Last Minute	02 Uke
1 Female	-70 F	16 Hand / Finger	06 Contusio	03 Skin / Subcutis	03 Left	01 First	01 Yes	01 On Tatami	02 No	02 Last Half	01 Tori
1 Female	-78 F	08 Mouth	08 Bleeding / Excoriatio	03 Skin / Subcutis	04 Right	01 First	01 Yes	01 On Tatami	02 No	02 Last Half	02 Uke
1 Female	-63 F	16 Hand / Finger	04 Distension	06 Ligament	04 Right	01 First	02 No	02 Out of Tatami	02 No
2 Male	-60 M	13 Elbow joint	04 Distension	06 Ligament	04 Right			02 Out of Tatami
2 Male	-60 M	13 Elbow joint	04 Distension	13 Joint	04 Right			02 Out of Tatami
1 Female	-48 F	13 Elbow joint	04 Distension	06 Ligament	03 Left	01 First	02 No	02 Out of Tatami	01 Yes	01 First Half	02 Uke
1 Female	-48 F	13 Elbow joint	04 Distension	13 Joint	03 Left	01 First	02 No	02 Out of Tatami	01 Yes	01 First Half	02 Uke
1 Female	-70 F	13 Elbow joint	04 Distension	06 Ligament	03 Left	01 First	02 No	02 Out of Tatami	02 No		02 Uke
1 Female	+70 F Cadet	13 Elbow joint	04 Distension	06 Ligament	04 Right	01 First	02 No	02 Out of Tatami	01 Yes		02 Uke
2 Male	+70 F Cadet	13 Elbow joint	04 Distension	06 Ligament	03 Left	01 First	01 Yes	02 Out of Tatami	02 No		02 Uke
1 Female	-57 F	24 Knee	04 Distension	06 Ligament	03 Left	01 First		02 Out of Tatami	02 No
1 Female	-57 F	24 Knee	05 Luxatio	13 Joint	03 Left	01 First		02 Out of Tatami	02 No
2 Male	-73 M	26 Ankle	04 Distension	06 Ligament	04 Right	01 First		02 Out of Tatami	02 No
2 Male	-73 M	26 Ankle	06 Contusio	13 Joint	04 Right	01 First		02 Out of Tatami	02 No
2 Male	-73 M	28 Other	04 Distension	06 Ligament	04 Right	01 First		01 On Tatami	01 Yes	03 Last Minute	02 Uke
2 Male	-73 M	28 Other	09 Rupture	06 Ligament	04 Right	01 First		01 On Tatami	01 Yes	03 Last Minute	02 Uke
1 Female	-57 F	03 Skull	06 Contusio	15 None	04 Right	01 First		02 Out of Tatami	02 No		01 Tori
2 Male	-66 M	16 Hand / Finger	04 Distension		03 Left		01 Yes	02 Out of Tatami	02 No		01 Tori
2 Male	-66 M	15 Wrist	04 Distension	06 Ligament	03 Left	01 First	01 Yes	02 Out of Tatami	02 No	01 First Half
1 Female	-63 F	18 Back	04 Distension	08 Muscle	05 Midline	01 First	01 Yes	02 Out of Tatami	02 No		02 Uke
1 Female	-48 F	19 Abdomen	06 Contusio	08 Muscle	04 Right	01 First	02 No	02 Out of Tatami	02 No
1 Female	-52 F	13 Elbow joint	03 Fracture	04 Bone	04 Right	01 First	02 No	01 On Tatami	01 Yes	03 Last Minute	02 Uke
1 Female	-63 F	13 Elbow joint	04 Distension	06 Ligament	03 Left	01 First	02 No	02 Out of Tatami	02 No	02 Last Half
1 Female	-70 F	09 Neck	12 Strangulation	07 Nerve / Brain	05 Midline	01 First	02 No	01 On Tatami	02 No	01 First Half	02 Uke
2 Male	-81 M	24 Knee	06 Contusio	13 Joint	03 Left	01 First	02 No	01 On Tatami	02 No	04 Golden Score
2 Male	-100 M	03 Skull	07 Commotio	07 Nerve / Brain	03 Left	01 First	02 No	02 Out of Tatami	01 Yes
2 Male	-100 M	12 Shoulder / Arm	05 Luxatio	13 Joint	03 Left	01 First	02 No	01 On Tatami	01 Yes	02 Last Half	02 Uke
1 Female	-52 F	11 Clavicle / AC	06 Contusio	06 Ligament	03 Left		01 Yes	02 Out of Tatami	02 No		02 Uke
1 Female	-57 F	15 Wrist	06 Contusio	06 Ligament	04 Right	01 First	02 No	01 On Tatami	02 No	02 Last Half	02 Uke
1 Female	-78 F	24 Knee	04 Distension	05 Cartilage	03 Left	01 First	02 No	02 Out of Tatami	01 Yes	04 Golden Score	02 Uke
2 Male	-73 M	09 Neck	12 Strangulation			01 First	02 No	01 On Tatami	02 No	02 Last Half	02 Uke
2 Male	+100 M	19 Abdomen	13 Other					02 Out of Tatami	02 No
2 Male	-90 M	17 Thorax	06 Contusio	05 Cartilage	04 Right	01 First	01 Yes	02 Out of Tatami	02 No	02 Last Half	02 Uke
2 Male	-90 M	24 Knee	06 Contusio	08 Muscle	03 Left	02 Second	01 Yes	02 Out of Tatami	02 No	02 Last Half	01 Tori
2 Male	-90 M	16 Hand / Finger	04 Distension	06 Ligament	04 Right	01 First	02 No	02 Out of Tatami	02 No	02 Last Half	02 Uke
2 Male	+100 M	18 Back	04 Distension	08 Muscle	04 Right	01 First	01 Yes	02 Out of Tatami	02 No	01 First Half	01 Tori
2 Male	-90 M	09 Neck	04 Distension	06 Ligament	10 Midline	01 First	01 Yes	02 Out of Tatami	02 No	01 First Half	02 Uke
2 Male	+100 M	11 Clavicle / AC	05 Luxatio	06 Ligament	04 Right	02 Second	02 No	01 On Tatami	01 Yes	01 First Half	01 Tori
1 Female	-63 F	26 Ankle	04 Distension	06 Ligament	03 Left	01 First	01 Yes	02 Out of Tatami	02 No	01 First Half	01 Tori
2 Male	-73 M	12 Shoulder / Arm	04 Distension	06 Ligament	04 Right	01 First	02 No	01 On Tatami	01 Yes	01 First Half	01 Tori
2 Male	-66 M	25 Leg	06 Contusio	08 Muscle	03 Left	01 First	01 Yes	02 Out of Tatami	02 No	02 Last Half	01 Tori
1 Female	-52 F	13 Elbow joint	04 Distension	06 Ligament	04 Right	01 First	01 Yes	02 Out of Tatami	02 No	03 Last Minute	01 Tori
1 Female	-48 F	03 Skull	08 Bleeding / Excoriatio	03 Skin / Subcutis	04 Right	01 First	01 Yes	02 Out of Tatami	02 No	03 Last Minute	01 Tori
1 Female	-52 F	03 Skull	07 Commotio	07 Nerve / Brain	05 Midline	01 First	01 Yes	01 On Tatami	02 No	02 Last Half	01 Tori
1 Female	-63 F	24 Knee	06 Contusio	06 Ligament	03 Left	01 First	01 Yes	01 On Tatami	02 No	03 Last Minute	01 Tori
1 Female	-63 F	27 Foot	06 Contusio	08 Muscle	03 Left	01 First	01 Yes	01 On Tatami	02 No	02 Last Half	02 Uke
1 Female	-70 F	24 Knee	05 Luxatio	06 Ligament	04 Right	01 First	01 Yes	01 On Tatami	02 No	03 Last Minute	02 Uke
1 Female	-78 F	26 Ankle	06 Contusio	06 Ligament	04 Right	01 First	01 Yes	02 Out of Tatami	02 No	04 Golden Score	01 Tori
1 Female	+78 F	25 Leg	04 Distension	08 Muscle	03 Left	01 First	01 Yes	02 Out of Tatami	02 No
1 Female	-48 F	03 Skull	07 Commotio	07 Nerve / Brain	05 Midline	01 First	01 Yes	01 On Tatami	02 No	03 Last Minute	01 Tori
1 Female	-52 F	13 Elbow joint	09 Rupture	06 Ligament	04 Right	01 First	02 No	01 On Tatami	01 Yes	03 Last Minute	02 Uke	arm lock
1 Female	-48 F	19 Abdomen	13 Other	14 Other	05 Midline	01 First	02 No	02 Out of Tatami	01 Yes
1 Female	-52 F	17 Thorax	06 Contusio	04 Bone	04 Right	01 First	01 Yes	01 On Tatami	02 No	02 Last Half
1 Female	-52 F	12 Shoulder / Arm	05 Luxatio	13 Joint	04 Right	01 First	02 No	01 On Tatami	01 Yes	02 Last Half
1 Female	-48 F	09 Neck	12 Strangulation	07 Nerve / Brain	05 Midline	01 First	02 No	01 On Tatami	02 No
2 Male	-73 M	04 Face	08 Bleeding / Excoriatio	03 Skin / Subcutis	04 Right	01 First	01 Yes	02 Out of Tatami	01 Yes
2 Male	-73 M	27 Foot	04 Distension	06 Ligament	03 Left	01 First	01 Yes	02 Out of Tatami	02 No
2 Male	-60 M	16 Hand / Finger	05 Luxatio	13 Joint	04 Right	01 First	01 Yes	02 Out of Tatami	02 No
2 Male	-66 M	09 Neck	12 Strangulation	07 Nerve / Brain	05 Midline	01 First	01 Yes	01 On Tatami	02 No
2 Male	-60 M	18 Back	04 Distension	06 Ligament	04 Right	01 First	01 Yes	01 On Tatami	02 No
2 Male	-66 M	24 Knee	04 Distension	06 Ligament	04 Right	01 First	02 No	01 On Tatami	01 Yes	02 Last Half
2 Male	-100 M	26 Ankle	04 Distension	06 Ligament	04 Right	01 First	01 Yes	02 Out of Tatami	02 No
2 Male	-81 M	04 Face	06 Contusio	08 Muscle	03 Left	01 First	01 Yes	02 Out of Tatami	02 No	02 Last Half
2 Male	-81 M	03 Skull	07 Commotio	07 Nerve / Brain	05 Midline	01 First	02 No	02 Out of Tatami	02 No
2 Male	-100 M	13 Elbow joint	04 Distension	06 Ligament	03 Left	01 First	01 Yes	02 Out of Tatami	02 No	02 Last Half
2 Male	+100 M	15 Wrist	04 Distension	06 Ligament	04 Right	02 Second	01 Yes	02 Out of Tatami	02 No
2 Male	-90 M	24 Knee	04 Distension	06 Ligament	03 Left	01 First	01 Yes	02 Out of Tatami	02 No
2 Male	-73 M	27 Foot	03 Fracture	04 Bone	03 Left	03 Third	02 No	02 Out of Tatami	02 No	02 Last Half
2 Male	-81 M	13 Elbow joint	04 Distension	06 Ligament	03 Left	01 First	02 No	02 Out of Tatami	02 No
2 Male	-100 M	13 Elbow joint	04 Distension	06 Ligament	03 Left	01 First	01 Yes	02 Out of Tatami	02 No
2 Male	-90 M	24 Knee	04 Distension	06 Ligament	03 Left	02 Second	01 Yes	02 Out of Tatami	02 No
2 Male	-81 M	03 Skull	08 Bleeding / Excoriatio	03 Skin / Subcutis	03 Left	01 First	02 No	02 Out of Tatami	02 No	03 Last Minute
2 Male	-90 M	11 Clavicle / AC	03 Fracture	04 Bone	04 Right	01 First	02 No	01 On Tatami	02 No	02 Last Half	02 Uke			Suspicion of Right Clavicle Fracture?
1 Female	-57 F	05 Eye	06 Contusio	11 Cornea	04 Right	01 First		02 Out of Tatami	01 Yes	03 Last Minute
1 Female	-70 F	09 Neck	12 Strangulation	07 Nerve / Brain	05 Midline	01 First	02 No	01 On Tatami	02 No	03 Last Minute
2 Male	-66 M	04 Face	08 Bleeding / Excoriatio	03 Skin / Subcutis		02 Second	01 Yes	01 On Tatami	02 No
2 Male	-60 M	13 Elbow joint	04 Distension	06 Ligament	03 Left	01 First		02 Out of Tatami	01 Yes
2 Male	-81 M	10 Throath	08 Bleeding / Excoriatio	03 Skin / Subcutis	05 Midline	02 Second	01 Yes	01 On Tatami	02 No
2 Male	-81 M	26 Ankle	04 Distension	06 Ligament	04 Right	01 First	02 No	01 On Tatami	02 No
2 Male	+100 M	24 Knee	06 Contusio	03 Skin / Subcutis	04 Right	01 First	01 Yes	01 On Tatami	02 No
2 Male	-81 M	13 Elbow joint	04 Distension	06 Ligament	03 Left	01 First	02 No	01 On Tatami	02 No
2 Male	-100 M	24 Knee	06 Contusio	13 Joint	04 Right	01 First	02 No	02 Out of Tatami	02 No
2 Male	-81 M	12 Shoulder / Arm	06 Contusio	06 Ligament	04 Right	01 First	01 Yes	02 Out of Tatami	01 Yes
1 Female	-44 F Junior	24 Knee	09 Rupture	06 Ligament	03 Left	01 First	02 No	01 On Tatami	02 No	03 Last Minute	02 Uke			MCL laesion 1-2
1 Female	-63 F	16 Hand / Finger	08 Bleeding / Excoriatio	14 Other	03 Left	01 First	01 Yes	01 On Tatami	02 No	02 Last Half				Partially lose nail
1 Female	-63 F	05 Eye	08 Bleeding / Excoriatio	14 Other	04 Right			02 Out of Tatami	02 No					Eye brow bleeding skin in training
2 Male	-60 M	29 None	12 Strangulation	07 Nerve / Brain		01 First	02 No	01 On Tatami	02 No	03 Last Minute	02 Uke	Strangulation		Loosing conscience a few seconds
2 Male	-60 M	16 Hand / Finger	08 Bleeding / Excoriatio	10 Nail	04 Right	01 First	01 Yes	01 On Tatami	02 No	01 First Half				Partially loose nail
2 Male	-73 M	05 Eye	08 Bleeding / Excoriatio	14 Other	03 Left	01 First	01 Yes	01 On Tatami	02 No	02 Last Half				Laceration to the upper eye
2 Male	-90 M	24 Knee	04 Distension	06 Ligament	04 Right	01 First	02 No	01 On Tatami	02 No	02 Last Half	02 Uke	o uchi gari		Old MCL laeson already tape and bandage
2 Male	-73 M	04 Face	08 Bleeding / Excoriatio	03 Skin / Subcutis	03 Left	01 First	02 No	02 Out of Tatami	01 Yes	02 Last Half	02 Uke			LACERATION TRANFEREWD TO THE HOSPITAL TO BE SUTURED
2 Male	-81 M	09 Neck	12 Strangulation	07 Nerve / Brain		01 First	02 No	02 Out of Tatami	02 No	03 Last Minute	02 Uke
1 Female	-57 F	11 Clavicle / AC	04 Distension	06 Ligament	03 Left	01 First	01 Yes	01 On Tatami	01 Yes	03 Last Minute	02 Uke
2 Male	-55 M Junior	27 Foot	06 Contusio	08 Muscle	04 Right	01 First	01 Yes	02 Out of Tatami	02 No	02 Last Half	02 Uke
1 Female	-63 F	12 Shoulder / Arm	04 Distension	06 Ligament	03 Left	01 First	01 Yes	01 On Tatami	01 Yes	02 Last Half	02 Uke			transferd to the hospital for further evaluation
1 Female	-52 F	11 Clavicle / AC	03 Fracture	04 Bone	04 Right	01 First	02 No	01 On Tatami	01 Yes	02 Last Half	02 Uke
1 Female	-63 F	26 Ankle	04 Distension	06 Ligament	03 Left	01 First	01 Yes	02 Out of Tatami	02 No
2 Male	-66 M	15 Wrist	04 Distension	06 Ligament	04 Right	01 First	01 Yes	02 Out of Tatami	02 No	01 First Half
2 Male	-60 M	24 Knee	06 Contusio	06 Ligament	03 Left	01 First	01 Yes	02 Out of Tatami	02 No
2 Male	-73 M	26 Ankle	04 Distension	06 Ligament	03 Left	01 First	01 Yes	02 Out of Tatami	02 No
2 Male	+100 M	24 Knee	04 Distension	06 Ligament	03 Left	01 First	02 No	02 Out of Tatami	02 No
1 Female	-52 F	24 Knee	09 Rupture	06 Ligament	04 Right	01 First	02 No	01 On Tatami	01 Yes	02 Last Half	02 Uke			Rupture of ACL & meniscus
2 Male	-66 M	25 Leg	08 Bleeding / Excoriatio	03 Skin / Subcutis	04 Right	01 First	01 Yes	01 On Tatami	02 No	03 Last Minute	02 Uke			excoriatio
2 Male	-81 M	09 Neck	07 Commotio	07 Nerve / Brain	05 Midline	01 First	01 Yes	01 On Tatami	02 No	03 Last Minute	02 Uke			concussion
2 Male	-81 M	04 Face	08 Bleeding / Excoriatio	03 Skin / Subcutis	04 Right	01 First	01 Yes	01 On Tatami	02 No	03 Last Minute	02 Uke			bleeding wound
1 Female	-57 F	24 Knee	09 Rupture	06 Ligament	04 Right	02 Second	02 No	02 Out of Tatami	01 Yes	02 Last Half	02 Uke			rupture of LCL
2 Male	-81 M	17 Thorax	06 Contusio	04 Bone	04 Right	01 First	02 No	01 On Tatami	02 No
2 Male	-73 M	27 Foot	08 Bleeding / Excoriatio	03 Skin / Subcutis	04 Right	01 First	01 Yes	01 On Tatami	02 No	01 First Half
1 Female	-52 F	13 Elbow joint	05 Luxatio	06 Ligament	03 Left	01 First	02 No	01 On Tatami	01 Yes	03 Last Minute	02 Uke
1 Female	-57 F	13 Elbow joint	05 Luxatio	06 Ligament	03 Left	01 First	02 No	01 On Tatami	01 Yes	03 Last Minute	02 Uke
2 Male	-90 M	03 Skull	07 Commotio	07 Nerve / Brain	05 Midline	01 First	01 Yes	01 On Tatami	02 No	03 Last Minute
1 Female	-52 F	18 Back	06 Contusio	08 Muscle	03 Left	01 First	01 Yes	02 Out of Tatami	02 No
1 Female	-57 F	12 Shoulder / Arm	04 Distension	06 Ligament	03 Left	01 First	01 Yes	02 Out of Tatami	02 No
1 Female	-48 F	11 Clavicle / AC	06 Contusio	06 Ligament	03 Left	01 First	01 Yes	02 Out of Tatami	02 No	03 Last Minute	02 Uke
1 Female	-57 F	26 Ankle	06 Contusio	06 Ligament	04 Right	01 First		02 Out of Tatami	02 No
1 Female	-70 F	13 Elbow joint	04 Distension	13 Joint	04 Right	01 First	02 No	01 On Tatami	02 No	02 Last Half	02 Uke
1 Female	-78 F	24 Knee	05 Luxatio	06 Ligament	03 Left	01 First	02 No	01 On Tatami	01 Yes	03 Last Minute	02 Uke
2 Male	-60 M	24 Knee	04 Distension	13 Joint	04 Right	01 First	01 Yes	01 On Tatami	02 No	02 Last Half
2 Male	-66 M	12 Shoulder / Arm	04 Distension	06 Ligament	03 Left	01 First	01 Yes	02 Out of Tatami	02 No	03 Last Minute
2 Male	-73 M	24 Knee	04 Distension	06 Ligament	04 Right	01 First	01 Yes	02 Out of Tatami	02 No	02 Last Half
2 Male	-73 M	11 Clavicle / AC	05 Luxatio	06 Ligament	03 Left	01 First	01 Yes	02 Out of Tatami	02 No	02 Last Half	02 Uke
2 Male	-90 M	04 Face	08 Bleeding / Excoriatio	03 Skin / Subcutis	03 Left	01 First	01 Yes	01 On Tatami	02 No	03 Last Minute
2 Male	-90 M	04 Face	08 Bleeding / Excoriatio	03 Skin / Subcutis	04 Right	01 First	01 Yes	01 On Tatami	02 No	03 Last Minute
2 Male	+100 M	13 Elbow joint	06 Contusio	13 Joint	03 Left	01 First	01 Yes	01 On Tatami	02 No	03 Last Minute
1 Female	-52 F	12 Shoulder / Arm	05 Luxatio	06 Ligament	04 Right	01 First	02 No	01 On Tatami	02 No	01 First Half	02 Uke
1 Female	-63 F	13 Elbow joint	04 Distension	06 Ligament	04 Right	01 First	02 No	01 On Tatami	02 No	03 Last Minute	02 Uke
1 Female	-70 F	09 Neck	12 Strangulation	07 Nerve / Brain	05 Midline	01 First	02 No	01 On Tatami	02 No	01 First Half
1 Female	+78 F	24 Knee	04 Distension	06 Ligament	03 Left	01 First	02 No	02 Out of Tatami	02 No	01 First Half
2 Male		24 Knee	06 Contusio	04 Bone		01 First	02 No	02 Out of Tatami	02 No
2 Male		26 Ankle	04 Distension	06 Ligament	04 Right	01 First	01 Yes	02 Out of Tatami	02 No
2 Male		25 Leg	06 Contusio	08 Muscle	04 Right	01 First	01 Yes	02 Out of Tatami	02 No
1 Female	-63 F	24 Knee	04 Distension	06 Ligament	04 Right	01 First	01 Yes	02 Out of Tatami	02 No	01 First Half
2 Male	-81F	03 skull	07 commotio	07 nerve/brain	04 right		02 no	02 out of tatami	02 no
1 Female	-57F	11 Clavicle / AC	04 Distension	06 Ligament	03 left	01 First	02 no	01 on tatami		02 last half
2 Male	-100F	11 clavicle/AC	04 Distension	06 ligament	03 left			02 out of tatami	02 no
1 Female	-63F	11 clavicle/AC	04 Distension	06 Ligament	03 left	01 First	02 no	01 on tatami/	02 no	03 last minute
1 Female	-44F	13 elbow joint	04 Distension	13 Joint	03 Left	01 First	02 no	01 on tatami	01 yes	03 last minute	02 Uke
2 Male	-90F	13 elbow joint	05 Luxatio	04 Bone	04 Right	01 First	02 no	01 on tatami	01 yes		02 Uke
2 Male	-73F	13 elbow joint	04 Distension	06 Ligament	03 left		02 No	02 out of tatami	02 no
2 Male	-73F	13 elbow joint	04 Distension	06 Ligament	03 left	01 First	02 no	01 On tatami	01 yes	02 last half	02 Uke
1 Female	-71F	13 elbow joint	04 Distension	06 Ligament	03 left		02 no	01 On tatami	02 no
1 Female	-63F	26 Ankle	04 Distension	06 Ligament	04 right	01 First	02 No	01 On tatami	02 no	03 last minute
1 Female	-78F	24 Knee	06 Contusio	06 Ligament	03 left	01 First	02 No	02 out of tatami	02 No	03 last minute
1 Female	-78F	12 Shoulder/Humerus	04 Distension	13 Joint	03 left	01 First	02 no	01 On tatami	02 No	03 last minute
2 Male	-50 M Cadet	27 Foot	06 Contusio	06 Ligament	04 Right	01 First	01 Yes	02 Out of Tatami	02 No	01 First Half
2 Male	-60 M	26 Ankle	03 Fracture	04 Bone	04 Right	01 First	02 No	01 On Tatami	01 Yes
2 Male	-55 M Junior	27 Foot	03 Fracture	04 Bone					01 Yes
1 Female	-52 F	20 Pelvis	06 Contusio	08 Muscle	03 Left	01 First	02 No	01 On Tatami	02 No	04 Golden Score
1 Female	-63 F	26 Ankle	04 Distension	06 Ligament	04 Right	01 First	02 No	02 Out of Tatami	02 No	02 Last Half	02 Uke
1 Female	-63 F	09 Neck	12 Strangulation	07 Nerve / Brain	05 Midline	01 First	02 No	01 On Tatami	02 No	03 Last Minute	02 Uke
2 Male	-81 M	24 Knee	04 Distension	06 Ligament	03 Left	01 First	02 No	01 On Tatami	01 Yes	01 First Half	02 Uke
2 Male	-81 M	16 Hand / Finger	05 Luxatio	06 Ligament	03 Left	01 First	01 Yes	01 On Tatami	02 No	02 Last Half
2 Male	-81 M	04 Face	06 Contusio	03 Skin / Subcutis	05 Midline	01 First	01 Yes	01 On Tatami	02 No	01 First Half
2 Male	-81 M	17 Thorax	03 Fracture	04 Bone	03 Left	01 First	02 No	01 On Tatami	01 Yes	01 First Half
2 Male	-60 M	14 Forearm	04 Distension	06 Ligament	04 Right	01 First	01 Yes	01 On Tatami	01 Yes	02 Last Half
1 Female	-52 F	13 Elbow joint	04 Distension	06 Ligament	04 Right	01 First	02 No	01 On Tatami	01 Yes	01 First Half
2 Male	-90 M	16 Hand / Finger	04 Distension	06 Ligament	04 Right	01 First	01 Yes	01 On Tatami	02 No
1 Female	-78 F	24 Knee	04 Distension	06 Ligament	04 Right	01 First	01 Yes	01 On Tatami	02 No	02 Last Half
2 Male	-60 M	13 Elbow joint	04 Distension	08 Muscle	03 Left	01 First	01 Yes	01 On Tatami	02 No
2 Male	-73 M	09 Neck	12 Strangulation	07 Nerve / Brain	05 Midline	01 First	02 No	01 On Tatami	02 No
1 Female	-48 F	23 Femur	04 Distension	08 Muscle	03 Left	01 First	01 Yes	02 Out of Tatami	02 No
1 Female	-63 F	09 Neck	04 Distension	08 Muscle	04 Right	01 First	01 Yes	02 Out of Tatami	02 No
1 Female	-57 F	13 Elbow joint	06 Contusio	06 Ligament	04 Right	01 First	02 No		02 No
1 Female	-52 F	26 Ankle	06 Contusio	06 Ligament	04 Right	01 First	01 Yes	02 Out of Tatami	02 No
1 Female	-70 F	24 Knee	06 Contusio	06 Ligament	03 Left	01 First	01 Yes	02 Out of Tatami	02 No
1 Female	-78 F	16 Hand / Finger	04 Distension	06 Ligament	04 Right	01 First	01 Yes	02 Out of Tatami	02 No
1 Female	+78 F	24 Knee	06 Contusio	06 Ligament	04 Right	01 First	01 Yes	02 Out of Tatami	02 No
1 Female	-48 F	13 Elbow joint	04 Distension	06 Ligament	04 Right	01 First	01 Yes	02 Out of Tatami	02 No	03 Last Minute	01 Tori
1 Female	-63 F	13 Elbow joint	04 Distension	06 Ligament	04 Right	01 First	01 Yes	02 Out of Tatami	02 No	02 Last Half	02 Uke
1 Female	-57 F	08 Mouth	08 Bleeding / Excoriatio	03 Skin / Subcutis	05 Midline	01 First	01 Yes	01 On Tatami	02 No	01 First Half	01 Tori
1 Female	-70 F	09 Neck	12 Strangulation	07 Nerve / Brain	05 Midline	01 First	02 No	01 On Tatami	02 No	01 First Half	02 Uke
1 Female	-78 F	12 Shoulder / Arm	06 Contusio	08 Muscle	04 Right	01 First	01 Yes	02 Out of Tatami	02 No
1 Female	-70 F	16 Hand / Finger	04 Distension	06 Ligament	04 Right	01 First	01 Yes	02 Out of Tatami	02 No
1 Female		12 Shoulder / Arm	04 Distension	06 Ligament	04 Right	01 First	02 No	01 On Tatami	02 No	03 Last Minute	01 Tori
2 Male	-60 M	12 Shoulder / Arm	06 Contusio	13 Joint	03 Left	01 First	01 Yes	01 On Tatami	02 No
2 Male	-60 M	12 Shoulder / Arm	04 Distension	13 Joint	04 Right	01 First	02 No	02 Out of Tatami	02 No
2 Male	-73 M	18 Back	04 Distension	06 Ligament	03 Left	01 First	02 No	02 Out of Tatami	02 No
2 Male	-66 M	13 Elbow joint	04 Distension	06 Ligament	04 Right	01 First	02 No	02 Out of Tatami	02 No
2 Male	-81 M	12 Shoulder / Arm	04 Distension	06 Ligament	04 Right	01 First	01 Yes	02 Out of Tatami	02 No
2 Male	-100 M	24 Knee	04 Distension	06 Ligament	04 Right	01 First	02 No	01 On Tatami	02 No
1 Female	-57 F	10 Throath	12 Strangulation	07 Nerve / Brain	05 Midline	01 First	02 No	01 On Tatami	02 No	01 First Half	02 Uke	Okuri
1 Female	-57 F	10 Throath	12 Strangulation	07 Nerve / Brain	05 Midline	02 Second	02 No	02 Out of Tatami	02 No	01 First Half	02 Uke
1 Female	-48 F	16 Hand / Finger	08 Bleeding / Excoriatio	10 Nail	04 Right	01 First	01 Yes	01 On Tatami	02 No	02 Last Half
1 Female	-52 F	08 Mouth	08 Bleeding / Excoriatio	03 Skin / Subcutis	05 Midline	01 First	01 Yes	01 On Tatami	02 No	03 Last Minute
1 Female	-57 F	10 Throath	12 Strangulation	07 Nerve / Brain	05 Midline	01 First	02 No	01 On Tatami	02 No	02 Last Half	02 Uke
1 Female	-63 F	08 Mouth	08 Bleeding / Excoriatio	03 Skin / Subcutis	05 Midline	01 First	01 Yes	01 On Tatami	02 No	01 First Half	01 Tori
1 Female	-70 F	10 Throath	12 Strangulation	07 Nerve / Brain	05 Midline	01 First	02 No	01 On Tatami	02 No	01 First Half	02 Uke	Sankaku
1 Female	-70 F	10 Throath	12 Strangulation	07 Nerve / Brain	05 Midline	01 First	02 No	01 On Tatami	02 No	03 Last Minute	02 Uke	Shime
1 Female	-78 F	27 Foot	08 Bleeding / Excoriatio	10 Nail	03 Left	01 First	01 Yes	02 Out of Tatami	02 No		01 Tori			Excoriatio nail and Bleeding
2 Male	-73 M	13 Elbow joint	04 Distension	06 Ligament	03 Left	01 First	01 Yes	02 Out of Tatami	02 No					Distension of left elbow ligament
2 Male	-73 M	11 Clavicle / AC	06 Contusio	13 Joint	03 Left	01 First	01 Yes	02 Out of Tatami	02 No					Contusio left Costaclavicular joint
2 Male	-73 M	24 Knee	04 Distension	06 Ligament	04 Right	01 First	01 Yes	02 Out of Tatami	02 No		01 Tori			Distension of right Knee lateral ligament
1 Female	-63 F	09 Neck	04 Distension	06 Ligament	03 Left	01 First	02 No	01 On Tatami	02 No	03 Last Minute	02 Uke			Neck ligamnet injury
1 Female	-57 F	26 Ankle	04 Distension	06 Ligament	04 Right	01 First	02 No	01 On Tatami	02 No	03 Last Minute	02 Uke			Ankle ligament injury,distension
2 Male	-100 M	12 Shoulder / Arm	04 Distension	06 Ligament	04 Right	01 First	01 Yes	01 On Tatami	02 No	03 Last Minute	01 Tori			Shoulder ligament injury,distension
2 Male	-73 M	13 Elbow joint	04 Distension	06 Ligament	04 Right	01 First	02 No	02 Out of Tatami	01 Yes
2 Male	-66 M	12 Shoulder / Arm	05 Luxatio	06 Ligament	03 Left	01 First	02 No	01 On Tatami	01 Yes
1 Female	+78 F	23 Femur	13 Other	08 Muscle	04 Right	01 First	02 No	01 On Tatami	02 No
2 Male	-66 M	12 Shoulder / Arm	05 Luxatio	06 Ligament	03 Left	01 First	02 No	02 Out of Tatami	01 Yes
1 Female	-52 F	13 Elbow joint	04 Distension	06 Ligament	04 Right	01 First	02 No	01 On Tatami	01 Yes	02 Last Half
2 Male	-55 M Junior	03 Skull	06 Contusio	03 Skin / Subcutis	05 Midline	01 First	01 Yes	01 On Tatami	02 No	04 Golden Score
1 Female	-52 F	24 Knee	06 Contusio	06 Ligament	04 Right	01 First	02 No	01 On Tatami	02 No	04 Golden Score
1 Female	-48 F	09 Neck	12 Strangulation	07 Nerve / Brain	05 Midline	01 First	02 No	01 On Tatami	02 No
1 Female	-52 F	24 Knee	04 Distension	06 Ligament	03 Left	01 First	02 No	01 On Tatami	02 No	04 Golden Score
1 Female	-63 F	24 Knee	05 Luxatio	13 Joint	04 Right	01 First	02 No	02 Out of Tatami	02 No	03 Last Minute
2 Male	-73 M	03 Skull	06 Contusio	06 Ligament	05 Midline	01 First	01 Yes	02 Out of Tatami	01 Yes	02 Last Half
1 Female	-63 F	11 Clavicle / AC	05 Luxatio	13 Joint	04 Right	01 First	02 No	01 On Tatami	02 No
2 Male	-73 M	09 Neck	12 Strangulation	07 Nerve / Brain	05 Midline	01 First	02 No	01 On Tatami	02 No	01 First Half
1 Female	-63 F	24 Knee	04 Distension	06 Ligament	03 Left	01 First	02 No	02 Out of Tatami	02 No
2 Male	-73 M	24 Knee	06 Contusio	04 Bone	03 Left	01 First	01 Yes	01 On Tatami	02 No
1 Female	-57 F	14 Forearm	04 Distension	06 Ligament	03 Left	01 First	02 No	01 On Tatami	02 No
2 Male	-90 M	09 Neck	12 Strangulation	07 Nerve / Brain	05 Midline	01 First	01 Yes	01 On Tatami	02 No	02 Last Half
2 Male	-90 M	15 Wrist	04 Distension	13 Joint	03 Left	01 First	02 No	01 On Tatami	02 No
2 Male	+100 M	23 Femur	06 Contusio	08 Muscle	04 Right	01 First	02 No	01 On Tatami	02 No
2 Male	+100 M	12 Shoulder / Arm	05 Luxatio	13 Joint	04 Right	01 First	02 No	01 On Tatami	02 No
2 Male	+90 M Cadet	03 Skull	06 Contusio	04 Bone	05 Midline	01 First	01 Yes	01 On Tatami	02 No	01 First Half	01 Tori
2 Male	+100 M	23 Femur	06 Contusio	08 Muscle	04 Right	01 First	02 No	01 On Tatami	02 No
2 Male	+100 M	12 Shoulder / Arm	05 Luxatio	13 Joint	04 Right	01 First	02 No	01 On Tatami	02 No
2 Male	-73 M	24 Knee	06 Contusio	04 Bone	03 Left	01 First	01 Yes	01 On Tatami	02 No
1 Female	-57 F	14 Forearm	04 Distension	06 Ligament	03 Left	01 First	02 No	01 On Tatami	02 No
2 Male	-90 M	09 Neck	12 Strangulation	07 Nerve / Brain	05 Midline	01 First	01 Yes	01 On Tatami	02 No
2 Male	-90 M	15 Wrist	04 Distension	13 Joint	03 Left	01 First	02 No	01 On Tatami	02 No
1 Female	-52 F	13 Elbow joint	04 Distension	06 Ligament	04 Right	01 First	02 No	01 On Tatami	01 Yes
2 Male	-55 M Junior	03 Skull	06 Contusio	03 Skin / Subcutis	05 Midline	01 First	01 Yes	01 On Tatami	02 No
1 Female	-52 F	24 Knee	06 Contusio	06 Ligament	04 Right	01 First	02 No	01 On Tatami	02 No
1 Female	-48 F	09 Neck	12 Strangulation	07 Nerve / Brain	05 Midline	01 First	02 No	01 On Tatami	02 No
1 Female	-52 F	24 Knee	04 Distension	06 Ligament	03 Left	01 First	02 No	01 On Tatami	02 No
1 Female	-63 F	09 Neck	12 Strangulation	07 Nerve / Brain	05 Midline	01 First	02 No	01 On Tatami	02 No
1 Female	-63 F	24 Knee	04 Distension	06 Ligament	04 Right	01 First	01 Yes	01 On Tatami	02 No
1 Female	-63 F	24 Knee	05 Luxatio	13 Joint	04 Right	01 First	02 No	01 On Tatami	02 No
2 Male	-73 M	03 Skull	06 Contusio	04 Bone	05 Midline	01 First	02 No	01 On Tatami	02 No
1 Female	-63 F	11 Clavicle / AC	05 Luxatio	13 Joint	04 Right	01 First	02 No	01 On Tatami	02 No
2 Male	-73 M	09 Neck	12 Strangulation	07 Nerve / Brain	05 Midline	01 First	02 No	01 On Tatami	02 No
1 Female	-63 F	24 Knee	04 Distension	06 Ligament	03 Left	01 First	02 No	02 Out of Tatami	02 No
2 Male	-73 M	24 Knee	06 Contusio	04 Bone	03 Left	01 First	02 No	02 Out of Tatami	02 No
1 Female	-57 F	14 Forearm	04 Distension	06 Ligament	03 Left	01 First	02 No	01 On Tatami	02 No
2 Male	-90 M	09 Neck	12 Strangulation	07 Nerve / Brain	05 Midline	01 First	02 No	01 On Tatami	02 No
2 Male	-90 M	15 Wrist	04 Distension	13 Joint	03 Left	01 First	02 No	01 On Tatami	02 No
2 Male	+100 M	23 Femur	06 Contusio	08 Muscle	04 Right	01 First	02 No	01 On Tatami	02 No
1 Female	-63 F	03 Skull	06 Contusio	04 Bone	05 Midline	01 First	01 Yes	01 On Tatami	02 No
1 Female	-52 F	13 Elbow joint	04 Distension	06 Ligament	03 Left	01 First	01 Yes	02 Out of Tatami	02 No
1 Female	-63 F	25 Leg	04 Distension	08 Muscle	04 Right	02 Second	02 No	02 Out of Tatami	02 No
1 Female	-63 F	13 Elbow joint	04 Distension	06 Ligament	04 Right	01 First	02 No	01 On Tatami	02 No
1 Female	-63 F	20 Pelvis	06 Contusio	08 Muscle	04 Right	01 First	02 No	01 On Tatami	02 No
1 Female	+78 F	24 Knee	04 Distension	06 Ligament	04 Right	01 First	02 No	01 On Tatami	01 Yes
2 Male	-60 M	12 Shoulder / Arm	06 Contusio	04 Bone	04 Right	01 First	02 No	02 Out of Tatami	01 Yes
2 Male	-60 M	16 Hand / Finger	04 Distension	06 Ligament	04 Right	01 First	01 Yes	02 Out of Tatami	02 No
1 Female	-78 F	11 Clavicle / AC	05 Luxatio	13 Joint	03 Left	01 First	01 Yes	02 Out of Tatami	02 No
2 Male	-73 M	25 Leg	06 Contusio	03 Skin / Subcutis	03 Left	01 First	01 Yes	02 Out of Tatami	02 No
1 Female	-70 F	07 Nose	03 Fracture	04 Bone	05 Midline	02 Second	02 No	02 Out of Tatami	01 Yes
1 Female	-70 F	03 Skull	07 Commotio	07 Nerve / Brain	05 Midline	01 First	02 No	02 Out of Tatami	02 No
2 Male	-90 M	24 Knee	04 Distension	06 Ligament	04 Right	01 First	02 No		02 No
2 Male	-90 M	24 Knee	04 Distension	06 Ligament	03 Left	01 First	02 No		02 No
2 Male	-90 M	12 Shoulder / Arm	04 Distension	06 Ligament	04 Right	01 First	02 No		02 No
1 Female	-63 F	16 Hand / Finger	06 Contusio	08 Muscle	03 Left	01 First	01 Yes		02 No
2 Male	-73 M	03 Skull	06 Contusio	03 Skin / Subcutis	05 Midline	01 First	01 Yes		02 No
2 Male	-100 M	24 Knee	04 Distension	06 Ligament	03 Left	01 First	02 No		02 No
2 Male	-100 M	24 Knee	04 Distension	06 Ligament	04 Right	01 First	01 Yes		02 No
2 Male	-100 M	12 Shoulder / Arm	06 Contusio	08 Muscle	03 Left	01 First	01 Yes		02 No
2 Male	-100 M	13 Elbow joint	04 Distension	06 Ligament	03 Left	01 First	01 Yes		02 No
2 Male	-81 M	24 Knee	04 Distension	06 Ligament	03 Left	01 First	01 Yes		02 No
2 Male	-100 M	26 Ankle	04 Distension	06 Ligament	03 Left	01 First	01 Yes		02 No
2 Male	-81 M	09 Neck	12 Strangulation	07 Nerve / Brain	05 Midline	01 First	02 No		02 No
2 Male	+100 M	26 Ankle	04 Distension	06 Ligament	03 Left	01 First	01 Yes		02 No
2 Male	-81 M	24 Knee	04 Distension	06 Ligament	03 Left		02 No		02 No
1 Female	-52 F	16 Hand / Finger	05 Luxatio	06 Ligament	03 Left	01 First	02 No	01 On Tatami	02 No
1 Female	-52 F	15 Wrist	04 Distension	06 Ligament	03 Left	01 First	02 No	01 On Tatami	02 No
1 Female	-70 F	13 Elbow joint	04 Distension	06 Ligament	03 Left	01 First	01 Yes	01 On Tatami	02 No
1 Female	-48 F	24 Knee	04 Distension	06 Ligament	03 Left	02 Second	02 No	01 On Tatami	01 Yes	03 Last Minute
2 Male	-60 M	09 Neck	06 Contusio	08 Muscle	05 Midline	01 First	02 No		02 No
1 Female	-63 F	04 Face	06 Contusio	03 Skin / Subcutis	03 Left	01 First	01 Yes	02 Out of Tatami	02 No
1 Female	-63 F	16 Hand / Finger	06 Contusio	08 Muscle	03 Left	01 First	01 Yes	02 Out of Tatami	02 No
1 Female	-52 F	26 Ankle	04 Distension	06 Ligament	04 Right	01 First	02 No	01 On Tatami	02 No
2 Male	-66 M	13 Elbow joint	06 Contusio	08 Muscle	04 Right	01 First	01 Yes	02 Out of Tatami	02 No
1 Female	-44 F Junior	13 Elbow joint	04 Distension	06 Ligament	03 Left	01 First	01 Yes	02 Out of Tatami	02 No
2 Male	-60 M	12 Shoulder / Arm	04 Distension	06 Ligament	03 Left	01 First	02 No	01 On Tatami	02 No
1 Female	-52 F	26 Ankle	04 Distension	06 Ligament	04 Right	01 First	02 No	01 On Tatami	01 Yes
2 Male	-66 M	11 Clavicle / AC	04 Distension	06 Ligament	04 Right	01 First	02 No	01 On Tatami	02 No
1 Female	-63 F	16 Hand / Finger	06 Contusio	08 Muscle	04 Right	01 First	01 Yes	02 Out of Tatami	02 No
1 Female	-52 F	25 Leg	04 Distension	06 Ligament	04 Right	01 First	02 No	01 On Tatami	02 No
2 Male	-73 M	12 Shoulder / Arm	06 Contusio	08 Muscle	03 Left	01 First	01 Yes	02 Out of Tatami	02 No
2 Male	-66 M	16 Hand / Finger	06 Contusio	03 Skin / Subcutis	03 Left	01 First	01 Yes	02 Out of Tatami	02 No
1 Female	-63 F	16 Hand / Finger	06 Contusio	05 Cartilage	03 Left	02 Second	01 Yes	02 Out of Tatami	02 No
1 Female	-63 F	11 Clavicle / AC	04 Distension	06 Ligament	03 Left	01 First	01 Yes	02 Out of Tatami	02 No
1 Female	-63 F	16 Hand / Finger	06 Contusio	03 Skin / Subcutis	03 Left	01 First	01 Yes	02 Out of Tatami	02 No
2 Male	-66 M	11 Clavicle / AC	05 Luxatio	13 Joint	04 Right	01 First	02 No	01 On Tatami	01 Yes
1 Female	-57 F	24 Knee	04 Distension	06 Ligament	04 Right	01 First	02 No	01 On Tatami	02 No
1 Female	-57 F	24 Knee	06 Contusio	04 Bone	04 Right	01 First	02 No	01 On Tatami	02 No
1 Female	-63 F	16 Hand / Finger	06 Contusio	04 Bone	04 Right	01 First	01 Yes	02 Out of Tatami	02 No
2 Male	+90 M Cadet	24 Knee	04 Distension	06 Ligament	03 Left	01 First	01 Yes	02 Out of Tatami	02 No
2 Male	-81 M	17 Thorax	06 Contusio	05 Cartilage	04 Right	01 First	02 No	01 On Tatami	02 No
2 Male	+90 M Cadet	24 Knee	04 Distension	06 Ligament	03 Left	01 First	02 No	01 On Tatami	02 No
2 Male	+90 M Cadet	23 Femur	04 Distension	08 Muscle	04 Right	01 First	02 No	01 On Tatami	02 No
1 Female	-70 F	13 Elbow joint	04 Distension	06 Ligament	04 Right	01 First	02 No	01 On Tatami	02 No
2 Male	+90 M Cadet	24 Knee	04 Distension	06 Ligament	04 Right	01 First	02 No	02 Out of Tatami	02 No
2 Male	-81 M	07 Nose	03 Fracture	04 Bone	05 Midline	01 First	02 No	01 On Tatami	01 Yes
1 Female	-70 F	11 Clavicle / AC	05 Luxatio	13 Joint	04 Right	01 First	02 No	01 On Tatami	01 Yes
2 Male	+90 M Cadet	18 Back	04 Distension	08 Muscle	04 Right	01 First	02 No	02 Out of Tatami	02 No
1 Female	+70 F Cadet	13 Elbow joint	06 Contusio	08 Muscle	04 Right	01 First	02 No	01 On Tatami	02 No
1 Female	+70 F Cadet	24 Knee	04 Distension	06 Ligament	03 Left	01 First	02 No	01 On Tatami	02 No
1 Female	-48 F	15 Wrist	08 Bleeding / Excoriatio	03 Skin / Subcutis	03 Left	01 First	01 Yes	01 On Tatami	02 No
1 Female	-48 F	13 Elbow joint	04 Distension	06 Ligament	04 Right	01 First	01 Yes	01 On Tatami	02 No
1 Female	-63 F	03 Skull	07 Commotio	07 Nerve / Brain	05 Midline	01 First	02 No	01 On Tatami	02 No
2 Male	-73 M	25 Leg	08 Bleeding / Excoriatio	03 Skin / Subcutis	03 Left	01 First	01 Yes	01 On Tatami	02 No
1 Female	-52 F	13 Elbow joint	04 Distension	06 Ligament	03 Left	01 First	02 No	01 On Tatami	01 Yes
1 Female	-52 F	13 Elbow joint	04 Distension	06 Ligament	04 Right	01 First	02 No	01 On Tatami	02 No
1 Female	-52 F	24 Knee	04 Distension	06 Ligament	03 Left	01 First	02 No	01 On Tatami	02 No
2 Male	+100 M	13 Elbow joint	04 Distension	06 Ligament	03 Left	01 First	02 No	01 On Tatami	02 No
1 Female	+78 F	27 Foot	03 Fracture	04 Bone	04 Right	01 First	02 No	01 On Tatami	01 Yes
1 Female	-52 F	15 Wrist	04 Distension	06 Ligament	04 Right	01 First	01 Yes	02 Out of Tatami	02 No
1 Female	-57 F	24 Knee	04 Distension	06 Ligament	03 Left	01 First	01 Yes	02 Out of Tatami	02 No
2 Male	-90 M	13 Elbow joint	04 Distension	06 Ligament	03 Left	01 First	01 Yes	02 Out of Tatami	02 No
1 Female	-48 F	03 Skull	07 Commotio	07 Nerve / Brain	05 Midline	01 First	02 No		02 No
1 Female	-63 F	03 Skull	07 Commotio	07 Nerve / Brain	05 Midline	01 First	02 No		02 No
1 Female	-78 F	24 Knee	04 Distension	06 Ligament	04 Right	01 First	02 No		02 No
1 Female	-78 F	24 Knee	04 Distension	06 Ligament	04 Right	01 First	02 No		02 No
2 Male	-81 M	12 Shoulder / Arm	04 Distension	08 Muscle	04 Right	01 First	01 Yes	02 Out of Tatami	02 No
2 Male	-100 M	27 Foot	04 Distension	13 Joint	04 Right	01 First	01 Yes	02 Out of Tatami	02 No
1 Female	-48 F	11 Clavicle / AC	05 Luxatio	06 Ligament	03 Left	01 First	02 No	01 On Tatami	01 Yes
1 Female	-63 F	24 Knee	05 Luxatio	06 Ligament	03 Left	01 First	02 No	01 On Tatami	01 Yes
1 Female	-52 F	16 Hand / Finger	03 Fracture	04 Bone	03 Left	01 First	02 No	01 On Tatami	01 Yes
1 Female	-52 F	11 Clavicle / AC	04 Distension	06 Ligament	03 Left	01 First	02 No	01 On Tatami	02 No
1 Female	-70 F	13 Elbow joint	04 Distension	06 Ligament	03 Left	01 First	01 Yes	01 On Tatami	02 No
1 Female	-70 F	16 Hand / Finger	04 Distension	06 Ligament	03 Left	01 First	01 Yes	01 On Tatami	02 No
1 Female	-70 F	13 Elbow joint	04 Distension	06 Ligament	03 Left		02 No	01 On Tatami	01 Yes
1 Female	-78 F	24 Knee	05 Luxatio	06 Ligament	03 Left	01 First	02 No	01 On Tatami	02 No
2 Male	-66 M	26 Ankle	03 Fracture	04 Bone	03 Left	01 First	02 No	01 On Tatami	01 Yes
2 Male	-66 M	12 Shoulder / Arm	05 Luxatio	06 Ligament	03 Left	01 First	02 No	01 On Tatami	01 Yes
2 Male	-73 M	12 Shoulder / Arm	05 Luxatio	06 Ligament	04 Right	01 First	02 No	01 On Tatami	01 Yes
2 Male	-100 M	09 Neck	04 Distension	06 Ligament	05 Midline	01 First	02 No	01 On Tatami	01 Yes
2 Male	-100 M	09 Neck	06 Contusio	08 Muscle	05 Midline	01 First	02 No	01 On Tatami	01 Yes
1 Female	+78 F	11 Clavicle / AC	03 Fracture	04 Bone	04 Right	01 First	02 No	01 On Tatami	01 Yes
1 Female	-57 F	11 Clavicle / AC	03 Fracture	04 Bone	03 Left	01 First	02 No	01 On Tatami	01 Yes
1 Female	-63 F	09 Neck	12 Strangulation	07 Nerve / Brain	05 Midline	01 First	02 No	01 On Tatami	02 No
1 Female	+78 F	24 Knee	04 Distension	06 Ligament	03 Left	03 Third	01 Yes	01 On Tatami	02 No
1 Female	-78 F	23 Femur	04 Distension	06 Ligament	04 Right	01 First	02 No	01 On Tatami	02 No
2 Male	-73 M	03 Skull	07 Commotio	07 Nerve / Brain	05 Midline	01 First	01 Yes	01 On Tatami	02 No
2 Male	-81 M	19 Abdomen	06 Contusio	08 Muscle	05 Midline	01 First	02 No	01 On Tatami	02 No
2 Male	-81 M	23 Femur	04 Distension	08 Muscle	04 Right	02 Second	02 No	02 Out of Tatami	02 No
2 Male	-81 M	13 Elbow joint	04 Distension	06 Ligament	03 Left	01 First	02 No	01 On Tatami	02 No
2 Male	-81 M	12 Shoulder / Arm	05 Luxatio	06 Ligament	03 Left	01 First	02 No	01 On Tatami	02 No
2 Male	-81 M	09 Neck	12 Strangulation	07 Nerve / Brain	05 Midline	01 First	02 No	01 On Tatami	02 No
2 Male	-90 M	11 Clavicle / AC	04 Distension	06 Ligament	03 Left	01 First	02 No	01 On Tatami	02 No
2 Male	-90 M	11 Clavicle / AC	04 Distension	06 Ligament	03 Left	01 First	02 No	01 On Tatami	02 No
2 Male	-90 M	12 Shoulder / Arm	05 Luxatio	13 Joint	03 Left	02 Second	02 No	01 On Tatami	02 No
2 Male	-100 M	26 Ankle	04 Distension	06 Ligament	03 Left	01 First	02 No	01 On Tatami	02 No
2 Male	-73 M	12 Shoulder / Arm	05 Luxatio	06 Ligament	03 Left	01 First	02 No	01 On Tatami	01 Yes
1 Female	-63 F	26 Ankle	04 Distension	06 Ligament	04 Right	01 First	02 No	02 Out of Tatami	02 No
2 Male	-66 M	13 Elbow joint	05 Luxatio	06 Ligament	03 Left	01 First	02 No	01 On Tatami	01 Yes
1 Female	-57 F	11 Clavicle / AC	06 Contusio	06 Ligament	03 Left	01 First	01 Yes	01 On Tatami	02 No
2 Male	-73 M	15 Wrist	06 Contusio	13 Joint	04 Right	01 First	01 Yes	02 Out of Tatami	02 No
2 Male	-66 M	11 Clavicle / AC	04 Distension	06 Ligament	04 Right	01 First	01 Yes	01 On Tatami	02 No
2 Male	-60 M	12 Shoulder / Arm	06 Contusio	13 Joint	03 Left	01 First	02 No	02 Out of Tatami	02 No
2 Male	-73 M	12 Shoulder / Arm	04 Distension	06 Ligament	03 Left	01 First	02 No	02 Out of Tatami	02 No
1 Female	-63 F	09 Neck	04 Distension	06 Ligament	05 Midline	01 First	01 Yes	01 On Tatami	02 No
2 Male	-66 M	04 Face	08 Bleeding / Excoriatio	03 Skin / Subcutis	03 Left	01 First	02 No	01 On Tatami	02 No
1 Female	-57 F	13 Elbow joint	04 Distension	06 Ligament	04 Right	01 First	01 Yes	01 On Tatami	02 No
1 Female	-48 F	13 Elbow joint	04 Distension	06 Ligament	04 Right	01 First	02 No	01 On Tatami	02 No
1 Female	-48 F	26 Ankle	04 Distension	06 Ligament	04 Right	01 First	02 No	01 On Tatami	02 No
1 Female	+78 F	09 Neck	12 Strangulation	07 Nerve / Brain	05 Midline	01 First	01 Yes	01 On Tatami	02 No
1 Female	+78 F	26 Ankle	04 Distension	06 Ligament	03 Left	01 First	01 Yes	01 On Tatami	02 No
2 Male	-100 M	13 Elbow joint	04 Distension	13 Joint	03 Left	01 First	01 Yes	01 On Tatami	02 No
1 Female	-63 F	16 Hand / Finger	08 Bleeding / Excoriatio	03 Skin / Subcutis	04 Right	01 First	01 Yes	01 On Tatami	02 No
2 Male	-81 M	13 Elbow joint	04 Distension	13 Joint	04 Right	01 First	02 No	01 On Tatami	01 Yes
2 Male	-81 M	03 Skull	08 Bleeding / Excoriatio	03 Skin / Subcutis	03 Left	01 First	02 No	01 On Tatami	01 Yes
1 Female	-48 F	11 Clavicle / AC	05 Luxatio	06 Ligament	04 Right	01 First	02 No	01 On Tatami	02 No
1 Female	-48 F	17 Thorax	06 Contusio	04 Bone	03 Left	01 First	01 Yes	02 Out of Tatami	02 No
1 Female	-48 F	24 Knee	04 Distension	06 Ligament	04 Right	01 First	02 No	01 On Tatami	02 No
1 Female	-52 F	13 Elbow joint	04 Distension	06 Ligament	04 Right	01 First	02 No	01 On Tatami	02 No
1 Female	-48 F	17 Thorax	06 Contusio	04 Bone	04 Right	01 First	01 Yes	02 Out of Tatami	02 No
1 Female	-78 F	25 Leg	06 Contusio	03 Skin / Subcutis	04 Right	01 First	01 Yes	02 Out of Tatami	02 No
1 Female	-70 F	15 Wrist	04 Distension	06 Ligament	03 Left	01 First	01 Yes	02 Out of Tatami	02 No
1 Female	-70 F	17 Thorax	06 Contusio	04 Bone	04 Right	01 First	01 Yes	02 Out of Tatami	02 No
1 Female	+78 F	24 Knee	04 Distension	06 Ligament	03 Left	01 First	01 Yes	02 Out of Tatami	02 No
2 Male	-81 M	15 Wrist	08 Bleeding / Excoriatio	03 Skin / Subcutis	03 Left	01 First	01 Yes	01 On Tatami	02 No
2 Male	-81 M	09 Neck	12 Strangulation	07 Nerve / Brain	05 Midline	01 First	02 No	01 On Tatami	02 No
2 Male	-100 M	25 Leg	03 Fracture	04 Bone	03 Left	01 First	02 No	02 Out of Tatami	01 Yes
2 Male	-60 M	16 Hand / Finger	04 Distension	06 Ligament	04 Right	01 First	01 Yes	01 On Tatami	02 No
2 Male	-66 M	16 Hand / Finger	06 Contusio	06 Ligament	03 Left	01 First	01 Yes	01 On Tatami	02 No
2 Male	-66 M	05 Eye	08 Bleeding / Excoriatio	03 Skin / Subcutis	04 Right	01 First	02 No	01 On Tatami	02 No
2 Male	-90 M	09 Neck	04 Distension	07 Nerve / Brain	03 Left	01 First	02 No	01 On Tatami	01 Yes
2 Male	-66 M	17 Thorax	06 Contusio	06 Ligament	05 Midline	01 First	01 Yes	02 Out of Tatami	02 No
2 Male	-90 M	13 Elbow joint	04 Distension	06 Ligament	03 Left	02 Second	01 Yes	02 Out of Tatami	02 No
2 Male	-90 M	15 Wrist	04 Distension	06 Ligament	04 Right	01 First	01 Yes	02 Out of Tatami	02 No
2 Male	-100 M	05 Eye	06 Contusio	03 Skin / Subcutis	04 Right	01 First	01 Yes	02 Out of Tatami	02 No
2 Male	-81 M	13 Elbow joint	06 Contusio	14 Other	04 Right	01 First	01 Yes	01 On Tatami	02 No
2 Male	+100 M	27 Foot	05 Luxatio	04 Bone	04 Right	01 First	02 No	02 Out of Tatami	01 Yes
1 Female	-48 F	09 Neck	12 Strangulation	07 Nerve / Brain	05 Midline	01 First	02 No	01 On Tatami	02 No
1 Female	-63 F	26 Ankle	04 Distension	06 Ligament	04 Right	01 First	02 No	01 On Tatami	01 Yes
2 Male	-60 M	09 Neck	06 Contusio	08 Muscle	05 Midline	01 First	02 No	01 On Tatami	02 No
1 Female	-52 F	16 Hand / Finger	04 Distension	06 Ligament	04 Right	01 First	01 Yes	01 On Tatami	02 No
1 Female	-48 F	24 Knee	04 Distension	06 Ligament	04 Right	01 First	02 No	02 Out of Tatami	02 No
1 Female	-52 F	03 Skull	06 Contusio	03 Skin / Subcutis	05 Midline	01 First	01 Yes	02 Out of Tatami	02 No
1 Female	-48 F	24 Knee	04 Distension	06 Ligament	04 Right	01 First	01 Yes	02 Out of Tatami	02 No
1 Female	-52 F	24 Knee	04 Distension	06 Ligament	03 Left	01 First	01 Yes	02 Out of Tatami	02 No
1 Female	-63 F	13 Elbow joint	04 Distension	06 Ligament	04 Right	01 First	02 No	02 Out of Tatami	02 No
1 Female	-48 F	26 Ankle	06 Contusio	03 Skin / Subcutis	03 Left	01 First	01 Yes	02 Out of Tatami	02 No
1 Female	-57 F	12 Shoulder / Arm	04 Distension	06 Ligament	04 Right	01 First	01 Yes	02 Out of Tatami	02 No
1 Female	-57 F	24 Knee	06 Contusio	03 Skin / Subcutis	03 Left	01 First	02 No	02 Out of Tatami	02 No
1 Female	-78 F	24 Knee	04 Distension	06 Ligament	04 Right	01 First	02 No	01 On Tatami	02 No
1 Female	+78 F	12 Shoulder / Arm	06 Contusio	08 Muscle	04 Right	01 First	02 No	01 On Tatami	02 No
1 Female	-70 F	24 Knee	06 Contusio	08 Muscle	03 Left	01 First	02 No	02 Out of Tatami	02 No
2 Male	-73 M	04 Face	08 Bleeding / Excoriatio	03 Skin / Subcutis	04 Right	01 First	01 Yes	01 On Tatami	02 No
1 Female	-57 F	12 Shoulder / Arm	06 Contusio	08 Muscle	03 Left	01 First	01 Yes	02 Out of Tatami	02 No
2 Male	-90 M	24 Knee	06 Contusio	13 Joint	04 Right	01 First	02 No	01 On Tatami	02 No
1 Female	-63 F	12 Shoulder / Arm	06 Contusio	06 Ligament	03 Left	01 First	01 Yes	02 Out of Tatami	02 No
2 Male	-90 M	16 Hand / Finger	05 Luxatio	06 Ligament	03 Left	01 First	01 Yes	02 Out of Tatami	02 No
2 Male	-100 M	11 Clavicle / AC	03 Fracture	04 Bone	03 Left	01 First	02 No	02 Out of Tatami	01 Yes
2 Male	-90 M	24 Knee	04 Distension	06 Ligament	04 Right	02 Second	02 No	02 Out of Tatami	02 No
1 Female	+78 F	04 Face	06 Contusio	03 Skin / Subcutis	03 Left	01 First	01 Yes	02 Out of Tatami	02 No
1 Female	-48 F	13 Elbow joint	04 Distension	06 Ligament	04 Right	01 First	01 Yes		02 No
1 Female	-52 F	13 Elbow joint	05 Luxatio	06 Ligament	04 Right	01 First	02 No		01 Yes
1 Female	-70 F	24 Knee	04 Distension	06 Ligament	04 Right	01 First	02 No		02 No
2 Male	-81 M	20 Pelvis	03 Fracture	04 Bone	04 Right	01 First	02 No		01 Yes
2 Male	-81 M	05 Eye	06 Contusio	03 Skin / Subcutis	04 Right	01 First	01 Yes		02 No
2 Male	-90 M	23 Femur	06 Contusio	08 Muscle	04 Right	01 First	01 Yes		02 No
1 Female	-57 F	11 Clavicle / AC	03 Fracture	04 Bone	03 Left	01 First	02 No	02 Out of Tatami	01 Yes
1 Female	-48 F	13 Elbow joint	06 Contusio	03 Skin / Subcutis	03 Left	01 First	01 Yes	02 Out of Tatami	02 No
1 Female	-52 F	24 Knee	06 Contusio	04 Bone	04 Right	01 First	01 Yes	02 Out of Tatami	02 No
1 Female	-52 F	12 Shoulder / Arm	06 Contusio	03 Skin / Subcutis	03 Left	01 First	01 Yes	02 Out of Tatami	02 No
2 Male	-90 M	10 Throath	12 Strangulation	07 Nerve / Brain	05 Midline	01 First	02 No	01 On Tatami	02 No
2 Male	-90 M	27 Foot	08 Bleeding / Excoriatio	03 Skin / Subcutis	04 Right	02 Second	01 Yes	01 On Tatami	02 No
1 Female	-70 F	24 Knee	06 Contusio	03 Skin / Subcutis	04 Right	01 First	01 Yes	02 Out of Tatami	02 No
2 Male	-100 M	12 Shoulder / Arm	06 Contusio	08 Muscle	03 Left	01 First	02 No	01 On Tatami	02 No
2 Male	-60 M	18 Back	06 Contusio	08 Muscle	05 Midline	01 First	02 No	01 On Tatami	02 No
2 Male	-66 M	24 Knee	06 Contusio	06 Ligament	04 Right	01 First	02 No	02 Out of Tatami	02 No
2 Male	-100 M	12 Shoulder / Arm	06 Contusio	08 Muscle	04 Right	01 First	02 No		02 No
2 Male	+100 M	03 Skull	08 Bleeding / Excoriatio	03 Skin / Subcutis	03 Left	01 First	01 Yes		02 No
2 Male	+100 M	16 Hand / Finger	06 Contusio	06 Ligament	03 Left	01 First	02 No		02 No
1 Female	-63 F	23 Femur	06 Contusio	08 Muscle	03 Left	01 First	02 No		01 Yes
1 Female	-63 F	12 Shoulder / Arm	04 Distension	06 Ligament	04 Right	01 First	01 Yes	02 Out of Tatami	02 No
1 Female	-63 F	13 Elbow joint	04 Distension	06 Ligament	03 Left	01 First	01 Yes	02 Out of Tatami	02 No
2 Male	-66 M	13 Elbow joint	04 Distension	06 Ligament	03 Left	01 First	02 No	02 Out of Tatami	02 No
2 Male	-66 M	09 Neck	04 Distension	06 Ligament	04 Right	01 First	01 Yes	01 On Tatami	02 No
2 Male	-73 M	09 Neck	04 Distension	06 Ligament	05 Midline	01 First	01 Yes	01 On Tatami	02 No
1 Female	-52 F	13 Elbow joint	04 Distension	06 Ligament	03 Left	01 First	01 Yes	02 Out of Tatami	02 No
1 Female	-52 F	13 Elbow joint	04 Distension	06 Ligament	03 Left	01 First	02 No	02 Out of Tatami	02 No
1 Female	-70 F	26 Ankle	04 Distension	06 Ligament	03 Left	01 First	02 No	02 Out of Tatami	02 No
2 Male	+100 M	24 Knee	06 Contusio	04 Bone	04 Right	01 First	01 Yes	02 Out of Tatami	02 No
2 Male	-90 M	17 Thorax	04 Distension	08 Muscle	04 Right	01 First	01 Yes	02 Out of Tatami	02 No
2 Male	-100 M	07 Nose	06 Contusio	04 Bone	05 Midline	01 First	02 No	02 Out of Tatami	02 No
2 Male	-66 M	24 Knee	06 Contusio	06 Ligament	04 Right	01 First	02 No		02 No
2 Male	-100 M	12 Shoulder / Arm	06 Contusio	08 Muscle	04 Right	01 First	02 No		02 No
2 Male	+100 M	11 Clavicle / AC	05 Luxatio	06 Ligament	03 Left	01 First	02 No		01 Yes
2 Male	+100 M	16 Hand / Finger	06 Contusio	06 Ligament	03 Left	01 First	02 No		02 No
2 Male	-66 M	16 Hand / Finger	04 Distension	06 Ligament	04 Right	01 First	02 No	01 On Tatami	02 No
2 Male	-73 M	04 Face	08 Bleeding / Excoriatio	03 Skin / Subcutis	03 Left	01 First	01 Yes	01 On Tatami	02 No
2 Male	-81 M	13 Elbow joint	04 Distension	06 Ligament	04 Right	01 First	01 Yes	02 Out of Tatami	02 No
2 Male	-66 M	13 Elbow joint	06 Contusio	04 Bone	03 Left	01 First	01 Yes	02 Out of Tatami	02 No
2 Male	-60 M	13 Elbow joint	04 Distension	13 Joint	04 Right	02 Second	01 Yes	02 Out of Tatami	02 No
2 Male	-60 M	13 Elbow joint	04 Distension	13 Joint	04 Right	01 First	01 Yes	02 Out of Tatami	02 No
2 Male	+100 M	16 Hand / Finger	04 Distension	06 Ligament	03 Left	01 First	01 Yes	02 Out of Tatami	02 No
2 Male	-90 M	24 Knee	04 Distension	06 Ligament	03 Left	01 First	01 Yes	02 Out of Tatami	02 No
1 Female	-52 F	03 Skull	07 Commotio	07 Nerve / Brain	03 Left	01 First	02 No		01 Yes
1 Female	-57 F	16 Hand / Finger	09 Rupture	03 Skin / Subcutis	04 Right	01 First	01 Yes		02 No
1 Female	-57 F	09 Neck	06 Contusio	08 Muscle	05 Midline	01 First	02 No		01 Yes
1 Female	+78 F	17 Thorax	06 Contusio	04 Bone	04 Right	01 First	02 No		02 No
1 Female	+78 F	19 Abdomen	06 Contusio	08 Muscle	04 Right	01 First	02 No		02 No
2 Male	-66 M	18 Back	04 Distension	08 Muscle	03 Left	01 First	01 Yes	02 Out of Tatami	02 No
2 Male	-60 M	27 Foot	04 Distension	06 Ligament	04 Right	01 First	01 Yes	02 Out of Tatami	02 No
2 Male	-66 M	25 Leg	04 Distension	08 Muscle	04 Right	01 First	01 Yes	02 Out of Tatami	02 No
2 Male	-60 M	27 Foot	04 Distension	05 Cartilage	04 Right	02 Second	02 No	02 Out of Tatami	02 No
2 Male	-66 M	17 Thorax	04 Distension	08 Muscle	04 Right	01 First	01 Yes	01 On Tatami	02 No
2 Male	-90 M	24 Knee	04 Distension	06 Ligament	04 Right	01 First	02 No	01 On Tatami	02 No
2 Male	-90 M	17 Thorax	08 Bleeding / Excoriatio	03 Skin / Subcutis	05 Midline	01 First	01 Yes	01 On Tatami	02 No
1 Female	-52 F	11 Clavicle / AC	04 Distension	06 Ligament	04 Right	01 First	02 No		02 No
1 Female	-78 F	10 Throath	06 Contusio	04 Bone	03 Left	01 First	02 No		02 No
1 Female	+78 F	12 Shoulder / Arm	04 Distension	06 Ligament	04 Right	01 First	02 No		02 No
1 Female	-63 F	09 Neck	12 Strangulation	07 Nerve / Brain	05 Midline	01 First	02 No	01 On Tatami	02 No
1 Female	-52 F	04 Face	06 Contusio	03 Skin / Subcutis	05 Midline	01 First	01 Yes	01 On Tatami	02 No
1 Female	-78 F	24 Knee	06 Contusio	03 Skin / Subcutis	03 Left	01 First	01 Yes	02 Out of Tatami	02 No
2 Male	-73 M	04 Face	08 Bleeding / Excoriatio	03 Skin / Subcutis	03 Left	01 First	02 No	01 On Tatami	01 Yes
2 Male	-66 M	14 Forearm	03 Fracture	04 Bone	04 Right	01 First	02 No	01 On Tatami	01 Yes
1 Female	-63 F	13 Elbow joint	05 Luxatio	04 Bone	04 Right	01 First	02 No	02 Out of Tatami	01 Yes
2 Male	-73 M	24 Knee	04 Distension	06 Ligament	03 Left	01 First	02 No	01 On Tatami	02 No
2 Male	-73 M	12 Shoulder / Arm	04 Distension	06 Ligament	03 Left	01 First	01 Yes	02 Out of Tatami	02 No
1 Female	-63 F	12 Shoulder / Arm	03 Fracture	04 Bone	03 Left	01 First	02 No	01 On Tatami	01 Yes
2 Male	-90 M	04 Face	09 Rupture	03 Skin / Subcutis	03 Left	01 First	01 Yes	01 On Tatami	02 No
2 Male	+100 M	24 Knee	04 Distension	06 Ligament	03 Left	01 First	02 No	01 On Tatami	02 No
1 Female	-78 F	13 Elbow joint	04 Distension	06 Ligament	03 Left	01 First	01 Yes	01 On Tatami	01 Yes
1 Female	-52 F	04 Face	08 Bleeding / Excoriatio	03 Skin / Subcutis	04 Right	01 First	01 Yes	01 On Tatami	02 No
2 Male	-66 M	11 Clavicle / AC	06 Contusio	05 Cartilage	05 Midline	01 First	01 Yes	02 Out of Tatami	02 No
2 Male	-60 M	17 Thorax	06 Contusio	05 Cartilage	03 Left	01 First	01 Yes	02 Out of Tatami	02 No
1 Female	-63 F	18 Back	04 Distension	06 Ligament	04 Right	01 First	02 No	02 Out of Tatami	02 No
2 Male	-90 M	24 Knee	04 Distension	06 Ligament	03 Left	01 First	02 No	02 Out of Tatami	02 No
1 Female	-70 F	09 Neck	04 Distension	08 Muscle	05 Midline		02 No	01 On Tatami	02 No
1 Female	-57 F	09 Neck	04 Distension	05 Cartilage	05 Midline		02 No	01 On Tatami	02 No
1 Female	-48 F	13 Elbow joint	05 Luxatio	06 Ligament	03 Left		02 No	01 On Tatami	01 Yes
2 Male	-60 M	09 Neck	12 Strangulation	07 Nerve / Brain	05 Midline		02 No	01 On Tatami	02 No
1 Female	-57 F	12 Shoulder / Arm	05 Luxatio	06 Ligament	04 Right		02 No	01 On Tatami	01 Yes
2 Male	-90 M	09 Neck	06 Contusio	06 Ligament	05 Midline		02 No	01 On Tatami	02 No
2 Male	-100 M	17 Thorax	04 Distension	05 Cartilage	04 Right		02 No	01 On Tatami	02 No
2 Male	-81 M	16 Hand / Finger	09 Rupture	03 Skin / Subcutis	03 Left		01 Yes	01 On Tatami	01 Yes
2 Male	-81 M	24 Knee	04 Distension	06 Ligament	04 Right		01 Yes	02 Out of Tatami	02 No
2 Male	-90 M	04 Face	09 Rupture	03 Skin / Subcutis	04 Right		01 Yes	01 On Tatami	02 No
2 Male	-73 M	24 Knee	04 Distension	06 Ligament	03 Left	01 First	02 No	02 Out of Tatami	02 No
2 Male	-100 M	09 Neck	04 Distension	06 Ligament	05 Midline	01 First	02 No	01 On Tatami	01 Yes
1 Female	-48 F	24 Knee	04 Distension	06 Ligament	03 Left	01 First	02 No	01 On Tatami	02 No	02 Last Half
2 Male	-100 M	08 Mouth	03 Fracture	04 Bone	03 Left	01 First	01 Yes	01 On Tatami	02 No	02 Last Half	02 Uke	morote seoi nage		FR dentis, Ita -SVK
2 Male	-81 M	17 Thorax	06 Contusio	05 Cartilage	04 Right	01 First	02 No	01 On Tatami	02 No	02 Last Half	01 Tori	Punch and sode tsuri komio goshi		First got punch on R medial lower chest, then tempted to sode tsuri komi goshi, when ac pain. Difficvult to breath, painful, not able to continue. Dg contusio seu Fr cartil.costae dx, ESP-ITA
2 Male	-90 M	24 Knee	09 Rupture	06 Ligament	03 Left	01 First	02 No	01 On Tatami	02 No	02 Last Half	02 Uke	Osoto gari maki komi	contest 46	Unhappy triadi genu sin. FRA-FRA . Nothing abnorma, but accident
2 Male	-73 M	17 Thorax	06 Contusio	08 Muscle	04 Right	01 First	02 No	01 On Tatami	02 No	04 Golden Score	01 Tori	Hidari uchi.mata		ESP-ESP, 66 kg Made uchimata, on tatami arm conpressed r.ribs and insertion of M.rectus abdominis . Not able to contine next contest.
2 Male	-81 M	05 Eye	08 Bleeding / Excoriatio	03 Skin / Subcutis	04 Right	01 First	01 Yes	01 On Tatami	01 Yes	02 Last Half	02 Uke			RUS-POR, Vulnus palpabrae superior o.dx, Suturatio in the hospital after contest.
2 Male	-60 M	11 Clavicle / AC	04 Distension	06 Ligament	03 Left	01 First	01 Yes	01 On Tatami	02 No	03 Last Minute	01 Tori	Hidari morote seoi nage		ESP 60 kg, made hidari seoinage,> Left AC sprain, continues to contest
2 Male	-73 M	04 Face	09 Rupture	03 Skin / Subcutis	04 Right	01 First	01 Yes	01 On Tatami	02 No	02 Last Half	01 Tori	kumi kata		skintears in eyebrow and on cheeck
2 Male	-66 M	12 Shoulder / Arm	05 Luxatio	06 Ligament	04 Right	01 First	02 No	01 On Tatami	01 Yes	02 Last Half	02 Uke			luxation of right shoulder
2 Male	-81 M	12 Shoulder / Arm	05 Luxatio	06 Ligament	03 Left	01 First	02 No	01 On Tatami	01 Yes	02 Last Half	02 Uke			luxation of left shoulder
2 Male	+100 M	23 Femur	04 Distension	08 Muscle	03 Left	01 First	02 No	02 Out of Tatami	02 No	03 Last Minute	02 Uke			distention left hamstring
2 Male	+100 M	23 Femur	04 Distension	08 Muscle	04 Right	01 First	02 No	02 Out of Tatami	02 No	02 Last Half	02 Uke			distention right hamstring
1 Female	-70 F	09 Neck	12 Strangulation	07 Nerve / Brain	05 Midline	01 First	02 No	01 On Tatami	02 No	02 Last Half	02 Uke	shimewaza		unconscious after strangulation
2 Male	-81 M	04 Face	08 Bleeding / Excoriatio	03 Skin / Subcutis	04 Right	01 First	01 Yes	01 On Tatami	02 No	02 Last Half	02 Uke			deep cut right eyebrow
2 Male	-66 M	13 Elbow joint	04 Distension	06 Ligament	03 Left	01 First	02 No	01 On Tatami	02 No	02 Last Half	02 Uke	juji-gatame		distention left elbox
2 Male	-90 M	24 Knee	04 Distension	06 Ligament	04 Right	01 First	02 No	01 On Tatami	01 Yes	03 Last Minute	02 Uke			distention medial collateral ligament
2 Male	-100 M	12 Shoulder / Arm	05 Luxatio	06 Ligament	03 Left	01 First	02 No	01 On Tatami	02 No	02 Last Half	02 Uke			luxation left shoulder
2 Male	-81 M	09 Neck	04 Distension	06 Ligament	04 Right	01 First	02 No	01 On Tatami	02 No	(02 Last Half)	02 Uke
1 Female	-78 F	12 Shoulder / Arm	04 Distension	06 Ligament	03 Left	01 First	02 No	01 On Tatami	02 No	(01 First Half)	02 Uke
2 Male	-90 M	24 Knee	04 Distension	06 Ligament	04 Right			02 Out of Tatami	02 No	(03 Last Minute)	02 Uke
2 Male	-73 M	12 Shoulder / Arm	05 Luxatio	06 Ligament	03 Left	01 First	02 No	01 On Tatami	01 Yes	03 Last Minute	01 Tori			dislocation of humerus bone
2 Male	-90 M	25 Leg	09 Rupture	08 Muscle	04 Right	01 First	02 No	01 On Tatami	02 No	02 Last Half	02 Uke			Rapture of abductor of femoris
2 Male	-81 M	03 Skull	07 Commotio	07 Nerve / Brain	05 Midline	01 First	01 Yes	01 On Tatami	02 No	02 Last Half	01 Tori			concussion of the brain
2 Male	-66 M	12 Shoulder / Arm	09 Rupture	08 Muscle	03 Left	01 First	02 No	01 On Tatami	01 Yes					rupt musc humeri sin, GBR-ROU
2 Male	-66 M	23 Femur	04 Distension	04 Bone	03 Left	01 First	02 No	01 On Tatami	01 Yes	01 First Half	02 Uke	migi harai-goshi		distensio seu subluxatio coaxae sin ;FIN-MDA
1 Female	-63 F	17 Thorax	06 Contusio	08 Muscle	05 Midline	01 First	02 No	01 On Tatami	02 No	01 First Half				Contusio thoracis ?-SLO
2 Male	-81 M	26 Ankle	06 Contusio		04 Right	01 First		01 On Tatami						Contusio tarsi dx, Ice
2 Male	-73 M	03 Skull	06 Contusio		03 Left	01 First	02 No	01 On Tatami						Contusio capitis seu commotio , Ice
2 Male	-60 M	13 Elbow joint	03 Fracture	04 Bone	04 Right	01 First	02 No	01 On Tatami	01 Yes	02 Last Half	02 Uke
2 Male	-73 M	13 Elbow joint	05 Luxatio	06 Ligament	04 Right	01 First	02 No	01 On Tatami	01 Yes	02 Last Half	02 Uke
1 Female	-63 F	11 Clavicle / AC	03 Fracture	04 Bone	04 Right	01 First	02 No	01 On Tatami	01 Yes	02 Last Half	01 Tori
2 Male	-90 M	07 Nose	08 Bleeding / Excoriatio	03 Skin / Subcutis	05 Midline	01 First	01 Yes	01 On Tatami	02 No	01 First Half	02 Uke
1 Female	-63 F	23 Femur	09 Rupture	08 Muscle	03 Left	01 First	02 No	01 On Tatami	02 No	02 Last Half	02 Uke
2 Male	-81 M	11 Clavicle / AC	04 Distension	06 Ligament	03 Left	01 First	01 Yes	02 Out of Tatami	02 No
2 Male	-66 M	06 Ear	06 Contusio	05 Cartilage	04 Right	01 First	01 Yes	01 On Tatami	02 No
2 Male	-100 M	12 Shoulder / Arm	04 Distension	06 Ligament	03 Left	01 First	01 Yes	01 On Tatami	02 No
2 Male	-60 M	06 Ear	09 Rupture	03 Skin / Subcutis	03 Left	01 First	01 Yes	01 On Tatami	02 No
2 Male	-81 M	24 Knee	06 Contusio	06 Ligament	03 Left	01 First	01 Yes	02 Out of Tatami	02 No
2 Male		12 Shoulder / Arm	06 Contusio	06 Ligament	04 Right	01 First	01 Yes	02 Out of Tatami	02 No
2 Male	-100 M	12 Shoulder / Arm	06 Contusio	06 Ligament	04 Right	01 First	02 No	02 Out of Tatami	02 No
1 Female	-57 F	27 Foot	05 Luxatio	06 Ligament	04 Right	01 First	02 No	01 On Tatami	01 Yes	03 Last Minute	02 Uke			Luxation of right Lisfrank joint
1 Female	-48 F	12 Shoulder / Arm	13 Other	13 Joint	04 Right	02 Second	02 No	01 On Tatami	02 No	02 Last Half	01 Tori			Subluxation of right shoulder
1 Female	-78 F	24 Knee	04 Distension	06 Ligament	04 Right	01 First	02 No	01 On Tatami	02 No	02 Last Half
1 Female	-57 F	17 Thorax	06 Contusio	05 Cartilage	05 Midline	01 First	02 No	01 On Tatami	02 No	03 Last Minute
2 Male	-73 M	24 Knee	09 Rupture	06 Ligament	04 Right	01 First	02 No	02 Out of Tatami	02 No	01 First Half	02 Uke			rupture of ACL of right knee
2 Male	-60 M	13 Elbow joint	09 Rupture	06 Ligament	03 Left	01 First	02 No	02 Out of Tatami	02 No	01 First Half	01 Tori			rupture of ligament of elbow joint
2 Male	-81 M	17 Thorax	06 Contusio	05 Cartilage	04 Right	01 First	02 No	02 Out of Tatami	02 No	01 First Half				contusio of thorax sternal rib joint
2 Male	-81 M	10 Throath	09 Rupture	08 Muscle	04 Right	01 First	02 No	02 Out of Tatami	02 No	01 First Half				rupture of big pectoralis muscle
2 Male	+100 M	09 Neck	06 Contusio	07 Nerve / Brain	05 Midline	01 First	02 No	01 On Tatami	01 Yes	04 Golden Score	02 Uke			contusio of the neck
2 Male	-90 M	04 Face	08 Bleeding / Excoriatio	03 Skin / Subcutis	03 Left	02 Second	01 Yes	01 On Tatami	02 No	04 Golden Score	02 Uke			bruised wound of the left eyebrow
691	Total	34	Skull	79	Skin / Subcutis	629	First	385	On Tatami	57	First Half
310	Female	26	Face	58	Bone	23	Second	234	Out of Tatami	90	Last Half
44.8625	% of total	9	Eye	19	Cartilage	4	Third	619	Total	82	Last Minute
2.74555	Relative %	4	Ear	323	Ligament	656	Total			10	Golden Score
381	Male	10	Nose	57	Nerve / Brain					239	Total
55.1375	% of total	8	Mouth	78	Muscle		295	Continues the fight
2.44686	Relative %	30	Neck	4	Nail		369	Has to stop the fight	134	Yes	56	Tori
		14	Throath	2	Cornea		664	Total	546	No	139	Uke
		40	Clavicle / AC	0	Tympanum				680	Total	195	Total
		66	Shoulder / Arm	43	Joint
		99	Elbow joint	5	Other
		6	Forearm	1	None
		15	Wrist	669	Total	1
		43	Hand / Finger	590	No Skin involved	0.881913
		24	Thorax
		11	Back		281	Left
		5	Abdomen		290	Right
		3	Pelvis		101	Midline
		0	Genitals		672	Total
		0	Inguinal
		17	Femur
		120	Knee
		13	Leg
		38	Ankle
		20	Foot
		2	Other
		1	None
		658	Total
	1	-40 F Cadet	29	Fracture
	0	-44 F Junior	0	Distension
Light	40	-48 F	60	Luxatio
Light	61	-52 F	159	Contusio
Middle	40	-57 F	19	Commotio
Middle	67	-63 F	49	Bleeding / Excoriatio
Middle	40	-70 F	27	Rupture
	5	+70 F Cadet	0	Contact lens
Heavy	24	-78 F	1	Bandage
Heavy	22	+78 F	45	Strangulation
	5	-50 M Cadet	6	Other
	0	-55 M Junior	0	None
Light	40	-60 M	667	Total
Light	52	-66 M
Middle	59	-73 M
Middle	69	-81 M
Middle	55	-90 M
	11	+90 M Cadet
Heavy	39	-100 M
Heavy	32	+100 M
	662	Total

## Sheet: Listing
Sex	Weight	Anat	Type	Tissue	Side	Visit n°	Cont F	Tatami	Hosp	Fight timing	tori/uke	Technique	Video ID	Video Tag	Doctors
1 Female	-40 F Cadet	03 Skull	03 Fracture	03 Skin / Subcutis	03 Left	01 First	01 Yes	01 On Tatami	01 Yes	01 First Half	01 Tori			Yes	Dr Peter Smolders
2 Male	-44 F Junior	04 Face	04 Distension	04 Bone	04 Right	02 Second	02 No	02 Out of Tatami	02 No	02 Last Half	02 Uke			No	Dr Pavel Chekeres
	-48 F	05 Eye	05 Luxatio	05 Cartilage	05 Midline	03 Third				03 Last Minute					Dr Turgay Demiray
	-52 F	06 Ear	06 Contusio	06 Ligament						04 Golden Score					Dr Peter Hidas
	-57 F	07 Nose	07 Commotio	07 Nerve / Brain											Dr Andrea Lino
	-63 F	08 Mouth	08 Bleeding / Excoriatio	08 Muscle											Dr Maximilien Jung
	-70 F	09 Neck	09 Rupture	10 Nail											Dr Lauri Malinen
	+70 F Cadet	10 Throath	10 Contact lens	11 Cornea											Dr Nikos Malliaropoulos
	-78 F	11 Clavicle / AC	11 Bandage	12 Tympanum											Dr Arnold Brons
	+78 F	12 Shoulder / Arm	12 Strangulation	13 Joint
	-50 M Cadet	13 Elbow joint	13 Other	14 Other
	-55 M Junior	14 Forearm	14 None	15 None
	-60 M	15 Wrist
	-66 M	16 Hand / Finger
	-73 M	17 Thorax
	-81 M	18 Back
	-90 M	19 Abdomen
	+90 M Cadet	20 Pelvis
	-100 M	21 Genitals
	+100 M	22 Inguinal
	+90 M Team	23 Femur
		24 Knee
		25 Leg
		26 Ankle
		27 Foot
		28 Other
		29 None
